# Density dependent environments can select for extremes of body size

T. Coulson<sup>1,\*</sup>

A. Felmy<sup>2</sup>

T. Potter<sup>3</sup>

G. Passoni<sup>1</sup>

R.A. Montgomery<sup>1</sup>

J.M. Gaillard<sup>5</sup>

P.J. Hudson<sup>4</sup>

J. Travis<sup>3</sup>

R.D. Bassar<sup>6</sup>

S. Tuljapurkar<sup>7</sup>

D.J. Marshall<sup>8</sup>

S.M. Clegg<sup>1</sup>

18 February 2022

## Abstract

Body size variation is an enigma. We do not understand why species achieve the sizes they do, and this means we also do not understand the circumstances under which gigantism or dwarfism is selected. We develop size-structured integral projection models to explore evolution of body size and life history speed. We make few assumptions and keep models simple: all functions remain constant across models except for the one that describes development of body size with age; size at sexual maturity is constant at 80% of asymptotic size across life histories; and density-dependence impacts only reproduction or juvenile survival. Carrying capacity is fitness in the models we develop and we are consequently interested in how it changes with size at sexual maturity, and how this association varies with development rate. The simple models generate complex dynamics while providing insight into the circumstances when extremes of body size evolve. We identify different areas of parameter space where gigantism and dwarfism evolve. The direction of selection depends upon emergent trade-offs among the proportion of each cohort that survives to sexual maturity, life expectancy at sexual maturity, and the per-capita reproductive rate. The specific trade-offs that emerge depend upon where density-dependence operates in the life history. Empirical application of the approach we develop has potential to help explain the enigma of body size

18 variation across the tree of life.

19 <sup>1</sup> Department of Biology, University of Oxford, Oxford, OX1 3SZ, UK

20 <sup>2</sup> Department of Evolutionary Biology and Environmental Studies, University of Zurich, Switzerland

21 <sup>3</sup> Department of Biological Science, Florida State University, Tallahassee FL 32306, USA

22 <sup>4</sup> The Huck Institutes, Penn State University, State College, PA 16802, USA

23 <sup>5</sup> Laboratoire de Biometrie et Biologie Evolutive, University of Lyon 1, Lyon, France

24 <sup>6</sup> Department of Biology, Williams College, Williamstown, MA 01267, USA

25 <sup>7</sup> Department of Biology, Stanford University, Palo Alto, CA 94305, USA

26 <sup>8</sup> School of Biological Sciences, Monash University, Melbourne, Victoria, Australia 3800

27 \* Correspondence: T. Coulson <[tim.coulson@zoo.ox.ac.uk](mailto:tim.coulson@zoo.ox.ac.uk)>

## 28 Introduction

29 Stout infantfish (*Schindleria brevipinguis*) achieve sexual maturity at less than 0.1g (Watson & Walker 2004) while  
30 blue whales (*Balaenoptera musculus*) can grow to weigh 150 tonnes representing a span in adult weights of over nine  
31 orders of magnitude. Lifespan in vertebrates is not quite so variable, but the range of three orders of magnitude  
32 is still impressive: Greenland sharks (*Somniosus microcephalus*) can live up to half a millennium (Nielsen *et al.*  
33 2016), while the coral reef fish, the seven-figure pygmy goby (*Eviota sigillata*), is elderly if it survives for two months  
34 (Depczynski & Bellwood 2005). There are clearly physiological limits that define the extremes of body size and  
35 longevity in vertebrates, but the factors that may push organisms towards these extremes are presently unclear.

36 Body size evolution, particularly when resulting in either gigantism or dwarfism, has long fascinated biologists. Body  
37 size variation across species is statistically associated with life history variation in an allometric manner (West *et al.*  
38 1997; Savage *et al.* 2004). As size increases, there is also an increase in the value of traits measured in units of mass  
39 (e.g. neonatal mass), time (e.g. life expectancy), and length (e.g. body length). In contrast, as size increases, the  
40 values of traits describing the frequency of events, such as reproductive rates, decrease.

41 Within species, patterns of size variation are less clear. Body size is regularly measured within populations, is often  
42 under directional selection, but rarely evolves in line with predictions (Kingsolver *et al.* 2001; Merilä *et al.* 2001).  
43 Body size evolution remains challenging to predict because identical processes can result in increases in body size  
44 and a slowing of the life history in some species, yet the exact opposite in others: food limitation selects for an  
45 increase in body size at sexual maturity in some species of fish (Travis *et al.* 2014), but a decrease in ungulates  
46 (Raia & Meiri 2006). Body size variation is an enigma, and we do not have a good understanding of why species are  
47 the size they are (Audzijonyte *et al.* 2020).

48 Darwinian demons are hypothetical creatures capable of simultaneously maximizing all components of fitness (Law  
49 1979). In doing so, they achieve sexual maturity immediately after birth, continuously produce litter sizes of an  
50 infinite number of viable young, and are immortal. They would presumably be tiny, perhaps infinitesimally so, given  
51 development takes time. Regardless of their size, we would instantaneously be neck-deep in such pests. Fortunately,  
52 Darwinian demons do not exist because all individuals face trade-offs.

53 In the absence of trade-offs, populations are expected to grow exponentially and organisms are expected to evolve  
54 towards a Darwinian demon life history as allocation of resources to early reproduction is always favored under  
55 such circumstances (McGraw & Caswell 1996; Coulson *et al.* 2006). Trade-offs occur when something prevents all  
56 components of fitness being maximized simultaneously (Stearns 1977; Stearns 1992; Kozłowski *et al.* 2020). Energy  
57 availability is frequently assumed to be the constraint that generates trade-offs (Kooijman & Kooijman 2010), but  
58 the availability of enemy-free space, breeding sites, water, or other molecules essential for life, can also generate  
59 them. Trade-offs consequently arise when something limits population growth. The question we are interested in

60 is how trade-offs can select for long developmental periods, large body size, and slow life histories, the apparent  
61 antithesis of Darwinian demons?

62 Approaches to understanding both life history and body size evolution often involve specifying a limiting factor  
63 and a life history trade-off, before identifying the fittest strategy. For example, in bioenergetic and dynamic energy  
64 budget models, energy is assumed to be limiting, the trade-off is specified via rules determining the allocation of  
65 energy to maintenance, development, and reproduction (Kooijman & Kooijman 2010), and the fittest strategy is  
66 identified, usually via an evolutionary game (Kozłowski 1992; Day & Taylor 1997; Koziowski & Weiner 1997). A  
67 related approach involves agnosticism as to the limiting factor, *a priori* specification of a trade-off between two  
68 components of the life history such as offspring number and offspring size (Smith & Fretwell 1974), and use of an  
69 evolutionary game to identify the fittest strategy (Roff 1993; Grant 1997; Meszena *et al.* 2002; Childs *et al.* 2004;  
70 Metcalf *et al.* 2008). A third alternative is to identify the quantity that evolution maximizes (e.g., fitness), and  
71 to examine how independently altering each part of the life history impacts fitness. Selection is then assumed to  
72 predominantly operate on the components with the largest sensitivities of fitness (Caswell 2001; Tuljapurkar *et al.*  
73 2009; Jones & Tuljapurkar 2015). This approach has been used for deterministic, density-independent environments  
74 where fitness is the population growth rate  $r$ , and stochastic, density-independent environments where fitness is the  
75 long-run stochastic growth rate  $a$  (Tuljapurkar *et al.* 2009).

76 The third approach has the virtue of making few assumptions as it does not require specification of a trade-off, but it  
77 does suffer from a shortcoming in that continuous population growth occurs in the absence of population limitation,  
78 and therefore environmentally-determined trade-offs shaping evolutionary trajectories may not exist. We address  
79 this limitation by using the approach in density-dependent environments where population limitation, by definition,  
80 exists (Turchin 1999). This imposes a constraint on population growth and mean lifetime reproductive success  $R_0$ ,  
81 but does not require us to make any assumptions about the cause of the limiting factor (e.g. energy or enemy-free  
82 space), and we do not need to specify a trade-off *a priori*. Instead, the trade-offs emerge as a function of where in  
83 the life cycle limiting processes operate most strongly, and where they are absent (see also Charlesworth 1994).

84 When trade-offs reveal themselves via the imposition of population limitation, population size will achieve an  
85 equilibrium referred to as carrying capacity  $K$ , density-dependence will be observed, and the population growth  
86 rate will equal zero. It is tempting to equate density-dependence with food limitation (White 2008), but that is  
87 too narrow a definition. Density dependence is simply a statistical pattern where no long-term temporal trend in  
88 population numbers is observed. Any limiting resource can generate density-dependent dynamics (Turchin 1999). In  
89 deterministic, density-dependent environments, regardless of the limiting process, fitness is carrying capacity (Lande  
90 *et al.* 2009; Sæther & Engen 2015; Kentie *et al.* 2020). It is helpful to briefly explain how to interpret this statement.  
91 Fitness is genetic representation of a heritable entity (be it an allele, genotype, phenotype, or strategy), either  
92 expected (Charlesworth 1994) or realized (Coulson *et al.* 2006), in a population at some point in the future.

93 Given future genetic representation will depend upon how quickly the heritable entity replicates and the degree  
94 of heritability (Fisher 1930), fitness can also be thought of as a growth rate, such as reproductive value (Grafen  
95 1999), or how quickly the entity can invade a population (Dieckmann *et al.* 2006). When carrying capacity is said  
96 to be fitness, it is shorthand for carrying capacity being able to predict future asymptotic representation within a  
97 population, and whether one heritable entity would replace another in an evolutionary game (Kentie *et al.* 2020).  
98 For example, consider competing strategies and assume that strategy  $A$  has a carrying capacity of  $X$  and strategy  $B$   
99 of  $X - q$ . If one individual of strategy  $B$  were introduced into a population of strategy  $A$  at its carrying capacity  $X$ ,  
100 it could not establish, because it would experience a population density that is greater than its carrying capacity and  
101 its replacement rate  $\lambda_B$ , and its mean lifetime reproductive success  $R0_B$  would both be less than unity. In contrast,  
102 if the experiment were repeated the other way around, strategy  $A$  would have a growth rate  $\lambda_A > 1$  and  $R0_A > 1$   
103 because it would be introduced into a population below its own carrying capacity (Meszena *et al.* 2002; Childs *et al.*  
104 2004; Dieckmann *et al.* 2006). If we know the carrying capacities of strategies  $A$  and  $B$ , we do not need to run an  
105 evolutionary game to identify the evolutionarily stable strategy (Kentie *et al.* 2020).

106 Since we know what fitness is in a density-dependent environment, we can use an approach related to those used for  
107 density-independent environments where we know what quantity evolution maximizes (Caswell 2001; Tuljapurkar  
108 *et al.* 2009; Jones & Tuljapurkar 2015). Because we are interested in understanding the evolution of extremes of  
109 body size, we develop size-structured models (that are density-dependent), and we examine how altering growth  
110 trajectories impacts body size and life history evolution while imposing a constraint that sexual maturity occurs at a  
111 fixed proportion of asymptotic size. We discover that:

- 112 1. Delaying sexual maturity can generate a demographic cost to juveniles, such that a smaller proportion of each  
113 cohort survives to maturity. If this cost is more than offset by a demographic benefit to adults, via either an  
114 increase in life expectancy or increased reproduction, then larger body sizes and slower life history strategies  
115 will be selected. If the juvenile fitness cost is not offset by the adult fitness benefit, then small body sizes and  
116 faster life histories will evolve.
- 117 2. Because carrying capacity is fitness in the models we develop, population growth and mean lifetime reproductive  
118 success both equal unity at equilibrium. Evolution acts to maximize population size, resulting in an inevitable  
119 reduction in the value of demographic rates influenced negatively by density-dependence for individuals of a  
120 given body size. As density-dependent demographic rates are minimized, those that are not density-dependent  
121 are maximized.
- 122 3. The simultaneous minimization of density-dependent rates and maximization of density-independent rates  
123 generates life history trade-offs. Where in the life history these trade-offs occur depends upon which demographic  
124 rates are influenced by negative feedbacks, and which are not.

## 125 Methods

126 We deliberately make few assumptions, and strive to keep models simple, while choosing forms of demographic  
127 functions that are typical of those observed in nature such as an increase in survival rate with body size, and a  
128 juvenile and adult stage either side of sexual maturity. Terms used in the text are defined in Table 1.

### 129 The model

130 We develop a size-structured integral projection model (IPM) (Coulson 2012; Ellner *et al.* 2016) that consists of  
131 four equations describing the association between body size  $z$  at time  $t$  and i) survival to time  $t + 1$ ,  $S(z, N, t) =$   
132  $\frac{1}{1 + e^{-(\beta_0 + \beta_z z + \beta_N N(t))}}$ , ii) development of surviving individuals from  $t$  to  $t + 1$ ,  $G(z'|z, N, t) = \theta(\mu = \alpha_0 + \alpha_z z +$   
133  $\alpha_N N(t), \sigma^2 = \alpha_v)$ , iii) the per-capita reproductive rate between  $t$  and  $t + 1$ ,

$$R(z, N, t) = \begin{cases} 0, & \text{if } z < z_a \\ e^{\rho_0 + \rho_z z + \rho_N N(t)}, & \text{otherwise} \end{cases} \quad (1)$$

134 and iv) the body size of these offspring at recruitment to the population at  $t + 1$ ,  $D(z'|z, N, t) = \theta(\mu = \gamma_0, \sigma^2 = \gamma_v)$   
135 where the  $\theta$ s are normal distributions with means of  $\mu$  and variances  $\sigma^2$ , and the  $\alpha$ s,  $\beta$ s,  $\gamma$ s and  $\rho$ s are parameters,  
136 and  $z_a$  is size at sexual maturity. These four functions combine to iterate forward the distribution of body size  
137  $N(z, t)$  within the population at time  $t$  to the distribution of body size  $N(z', t + 1)$  at time  $t + 1$ :

$$N(z', t + 1) = \int (D(z'|z, N, t)R(z, N, t) + G(z'|z, N, t)S(z, N, t)) N(z, t) dz. \quad (2)$$

138 The function  $G(z'|z, N, t)$  is called the development function as is standard nomenclature in IPM notation (Coulson  
139 *et al.* 2017), and, in the models we develop, describes growth from one age to the next. IPMs can be constructed  
140 for any continuous phenotypic trait – not just body size – and the function can be mechanistic, capturing detailed  
141 developmental pathways, or phenomenological based on repeated phenotypic measurements taken on the same  
142 individuals over time (Ellner *et al.* 2016; Smallegange *et al.* 2017; Lachish *et al.* 2020).

143 Because this is a density-dependent model, at equilibrium  $N(z, t) = N(z', t + 1)$ . We discretise each of the functions  
144 to allow us to approximate the integral projection model in matrix form using standard approaches (Ellner *et al.*  
145 2016). At equilibrium, the approximation is  $\mathbf{K} = (\mathbf{DR} + \mathbf{GS})\mathbf{K}$  where  $\mathbf{K}$  is a vector describing the population  
146 structure at carrying capacity.

147 For simplicity, we only include density-dependence in one function at a time. In the first scenario, reproduction is  
148 density-dependent and  $\rho_N < 0$ , while in the second, the density-dependent demographic rate is juvenile survival. In  
149 the second scenario,

$$S(z, N, t) = \begin{cases} \beta_N < 0, & \text{if } z < z_a \\ \beta_N = 0, & \text{otherwise} \end{cases}$$

150 At equilibrium, when the population size of a life history is at carrying capacity, both the population growth rate  $\lambda$   
151 and mean lifetime reproductive  $R_0$  are equal to unity – the dominant eigenvalue of the matrix approximation is 1.  
152 Our analysis proceeds by iterating a population with a given life history strategy through time until it reaches  $K$ .  
153 We then report dynamics at  $K$  for each life history. We compare across life histories to draw conclusions on the  
154 direction of evolution.

## 155 Defining life history strategies

156 Within each of the two scenarios, we construct 20 models, with each model representing a different life history  
157 strategy. Within a scenario, each of these 20 models has identical parameter values for each function, with the  
158 exception of the development function  $G(z'|z, N, t)$  and the size at sexual maturity  $z_a$  which is always 80% of  
159 asymptotic size. Different parameterisations of the development function generate different stable size distributions  
160 (the dominant right eigenvector of the IPM evaluated at  $K$ ) for each life history, and these differences generate  
161 variation in age-specific survival rates (see below). Demographic rates must combine to give  $\lambda = R_0 = 1$  at  
162 equilibrium. Because survival rates vary across life history in both scenarios, the one degree of freedom available  
163 within the model to satisfy the condition  $\lambda = R_0 = 1$  at equilibrium is the value of  $K$  in the density-dependent  
164 function (reproduction in scenario 1, juvenile survival in scenario 2). For each model, we find the value of  $K$  via  
165 simulation. The life history with the largest value of  $K$  will be the fittest, and in an evolutionary game would grow  
166 to dominate the population.

167 We keep the models simple by assuming that each reproducing parent produces the same distribution of offspring  
168 body sizes regardless of their size or life history strategy (Figure 1(A)). We also assume that all offspring develop at  
169 the same pace over the first year of life regardless of life history strategy. After that age, the development functions  
170 diverge among the life histories (Figure 1(B)), such that those that will go on to achieve a larger size and greater  
171 age at sexual maturity continue to develop quickly, while those that will mature at a smaller size and lesser age  
172 slow their growth rates, reaching their asymptotic sizes at a younger age (Figure 1(C)). The growth models are  
173 monomolecular, such that growth rate slows with increasing size (Table 2, growth parameters). We choose this  
174 formulation because (i) monomolecular growth is a good descriptor of growth in many species, and (ii) it requires  
175 fewer parameters than non-linear growth forms (Gaillard *et al.* 1997; English *et al.* 2012). It is possible that a  
176 change in size at sexual maturity as life histories evolve will result in change in the form of the development function,  
177 for example, from monomolecular to logistic. Such a change might reflect, for example, individuals evolving to grow  
178 more slowly but for longer to achieve a larger size at sexual maturity as in island birds (Sandvig *et al.* 2019), but we

179 do not consider functional forms of growth other than monomolecular here.

180 Survival rates increase with body size in all life histories in the same manner (Figure 1(D)), although when density-  
181 dependence operates on juvenile survival in the second scenario this function is depressed below  $z < z_a$  for each  
182 life history (see below). Reproduction does not vary with size, i.e.  $\rho_z = 0$  in both scenarios, but the elevation  
183 of the function does vary with population density in the first scenario where reproduction is density dependent.  
184 Parameter values slightly differ for the two scenarios to enable us to more easily explain the observed dynamics, and  
185 are presented in Table 2.

## 186 Exploring Model Dynamics

187 We address two complementary questions: 1) How does maximizing  $K$  lead to the evolution of extreme body sizes  
188 and life histories? 2) How does the evolution of extreme body sizes and life histories translate into demographic  
189 patterns that maximize carrying capacity? To do this, we need to examine the population dynamics and life history  
190 the model describes. Because the model distinguishes juveniles  $z < z_a$  and adults  $z \geq z_a$ , we find it useful to write  
191 the population dynamics and life history the models predict in terms of juvenile and adult rates. In this section,  
192 we describe some initial insights from the model structure, and explain how we extract the dynamics in terms of  
193 juvenile and adult rates.

194 One thing is immediately apparent from the model structure: as carrying capacity increases across life histories,  
195 the predicted value of the density-dependent rates will decrease **all other things being equal**. For example, in  
196 scenario 1 where reproduction is density-dependent, the strategy with the highest carrying capacity will have the  
197 most negative value of the term  $\rho_N K$ , and, on the scale of response, the smallest value of  $e^{\rho_0 + \rho_N K}$ . In scenario 2,  
198 the fittest strategy will have the most negative value of the term  $\beta_N K$  and, on the scale of response, the smallest  
199 value of  $1/(1 + e^{-(\beta_0 + \beta_N K)})$ . Evolution consequently acts to minimize the value of the density-dependent rates.

200 A population at carrying capacity is at an equilibrium size, and the population growth rate  $\lambda = 1$ . As evolution  
201 minimizes the value of density-dependent terms, acting to minimize the value of density-dependent demographic  
202 rates, other rates must increase, as the population growth rate is a function of per-capita demographic rates. In our  
203 models, as we change the development rate, we alter the value of density-independent survival rates: both juvenile  
204 and adult survival rates in scenario 1, and adult survival rate in scenario 2. The values of the density-independent  
205 rates determine the value that the density-dependent rates must take, and consequently carrying capacity.

206 In many real-world cases, demographic functions include other terms beyond those involving density. For example,  
207 in our scenario 2, where juvenile survival is the density-dependent function, juvenile survival is influenced by body  
208 size ( $\beta_z > 0$ ) and density. Population density and mean body size covary across life histories, which complicates the  
209 association between juvenile survival rate and fitness  $K$  across life histories. Although evolution acts to minimize



210 juvenile survival via the density-dependent term  $\beta_N K$ , covariation with mean body size means the least fit strategy  
 211 does not have the lowest value of juvenile survival, as mean body size is larger in the life history strategy with  
 212 minimum fitness compared to faster, smaller-bodied life histories. Biologically what this means is evolution can act to  
 213 maximize one (or more) density-independent terms within a demographic function while simultaneously minimizing  
 214 another term in the same function. In our scenario 2, evolution acts to maximize survival via the density-independent  
 215 term  $\beta_z z$  while simultaneously minimizing the density-dependent term  $\beta_N K$ .

We include density-dependence in either adult reproduction (scenario 1) or juvenile survival (scenario 2). To gain insights into the dynamics the models predict, it makes sense to write the predicted population dynamics as a function of juvenile and adult age classes and their rates. We do this by writing,

$$\begin{aligned}
 K &= K_j + K_a \\
 K &= N_j \bar{S}_{j,K} + N_a (\bar{S}_{a,K} + \bar{R}_{a,K}) \\
 1 &= \frac{N_j}{K} \bar{S}_{j,K} + \frac{N_a}{K} (\bar{S}_{a,K} + \bar{R}_{a,K})
 \end{aligned} \tag{3}$$

216 where  $K_j$  and  $K_a$  are the numbers of juveniles and adults at carrying capacity, and  $\bar{S}_{x,K}$  and  $\bar{R}_{x,K}$  describe mean  
 217 survival and reproductive rates in age class  $x$  at carrying capacity  $K$ . Reproductive rates will always be zero for  
 218 juveniles. We refer to the  $N_j \bar{S}_{j,K}$ ,  $N_a \bar{S}_{a,K}$  and  $N_a \bar{R}_{a,K}$  as respectively the juvenile survival, adult survival, and  
 219 adult reproduction terms, and  $N_a (\bar{S}_{a,K} + \bar{R}_{a,K})$  as the adult demographic performance term. We calculate each of  
 220 these quantities from model predictions using approaches in Coulson *et al.* (2010). We then explore how these terms  
 221 vary with size at sexual maturity to gain insights into how inclusion of density-dependence into one demographic  
 222 rate influences its value and those of the density-independent rates. Note that the equations provide a description of  
 223 the population dynamics, but are not dynamically sufficient.

224 We can also usefully summarize the life histories the models describe using survivorship and fertility schedules. In  
 225 particular, for an age-structured density-dependent life history at carrying capacity we can write the Euler-Lotka  
 226 identity as

$$1 = \int_{a=0}^{\infty} L(a, K) R(a, K) da \tag{4}$$

227 where  $L(a, K)$  and  $R(a, K)$  are respectively survivorship to age  $a$  and per-capita reproductive success at age  $a$ , both  
 228 evaluated at carrying capacity,  $K$ . Because reproduction does not occur until sexual maturity is reached

$$1 = \int_{a=a_m}^{\infty} L(a, K) R(a, K) da. \tag{5}$$

229 where  $a_m$  is age at sexual maturity. In the models  $R(a, K)$  is constant across ages beyond sexual maturity within a

230 life history so we simplify to  $R(K)$  then write,

$$1 = L(a_m, K)R(K) \frac{\int_{a=a_m}^{\infty} L(a, K) da}{L(a_m, K)}. \quad (6)$$

231 The survivorship term  $L(a_m, K)$  is the proportion of each cohort surviving to sexual maturity, and  $\frac{\int_{a=a_m}^{\infty} L(a, K) da}{L(a_m, K)}$   
232 is life expectancy at sexual maturity that we write as  $E(a_m, K)$ . This reveals a trade-off between per-capita  
233 reproduction, the proportion of each cohort surviving to sexual maturity, and life expectancy at sexual maturity. In  
234 scenario 1,  $R(a, K)$  is density-dependent, so we separate the density-dependent and -independent rates, such that,

$$\frac{1}{R(a, K)} = L(a_m)E(a_m) \quad (7)$$

235 and

$$-\log(R(a, K)) = \log(L(a_m)E(a_m)). \quad (8)$$

236 We therefore expect to see a trade-off between the product of demographic parameters that are density-independent,  
237 with the value of demographic parameters influenced by density-dependence.

238 We can calculate these continuous age-structured quantities by using Steiner *et al.*'s (2012) derivation of a stage  
239 duration matrix,  $\mathbf{P} = (\mathbf{I} - \mathbf{T})^{-1}$  where  $\mathbf{I}$  is the identity matrix and  $\mathbf{T} = \mathbf{GS}$ . Each  $i, j$  element in this matrix  
240 describes the expected amount of time an individual in stage  $i$  will spend in stage  $j$  before death. We can sum these  
241 elements across columns (rows) to calculate life expectancy for an individual at sexual maturity, and survivorship  
242 from the size distribution at birth to the size at sexual maturity (Steiner *et al.* 2012), providing us with the terms in  
243 equation (7).

## 244 Results

### 245 Disruptive selection on body size

246 In both scenarios we observe disruptive selection on body size (Figure 2(A,B)): for the parameter values we work with  
247 we observe a life history strategy of minimum fitness. To the left of this threshold on the  $x$ -axis we see directional  
248 selection for small body size at sexual maturity and a fast life history, while to the right of it the opposite pattern is  
249 observed.

### 250 Fitness Maximization

251 Carrying capacity is fitness in negative density-dependent integral projection models (Kentie *et al.* 2020), with  
252 evolution consequently acting to maximize  $K$ . As carrying capacity increases across life histories, intercepts plus

253 terms that include  $K$  in the functions will decrease in value on the scale of response (see above). As an example, in  
254 scenario 1, the value of the term  $e^{\rho_0 + \rho_N N}$  in the reproduction function changes across life history. However, the  
255 survival and reproduction functions can also include terms describing the effect of body size on the demographic rate.  
256 For example, in scenario 2, juvenile survival is influenced by both density and body size. We deliberately formulated  
257 the two scenarios, by setting some parameters to zero (Table 2), so that models contain only one density-dependent  
258 term, and only one body size term across the survival and reproduction functions. In scenario one, density influences  
259 reproduction while body size influences survival, while in scenario two, reproduction is constant and juvenile survival  
260 is influenced by body size and population density, and adult survival is influenced by body size.

261 As we change the development function (and asymptotic size and size at sexual maturity), both mean survival rates  
262 and survivorship schedules also change even though the size-survival function remains constant. The reason for this,  
263 illustrated below, is because individuals are developing at a faster rate if they achieve larger body sizes at sexual  
264 maturity. As survival and survivorship schedules change, the density-dependent term in the density-dependent  
265 demographic rate function must change in response to achieve a value such that  $\lambda = R_0 = 1$  resulting in a stable  
266 size-structure (Figure 2(C,D)).

267 The life history and population dynamics this (relatively) simple feedback generates are surprisingly nuanced. We  
268 consider each of the two scenarios in turn.

## 269 Population Dynamics

270 We were unable to identify life history trade-offs by examining per-time step juvenile survival, adult survival, and  
271 adult reproductive, and instead observed very different patterns across the two scenarios. We show this by drawing  
272 on results from the two scenarios.

273 In scenario 1, the fittest strategies tended to have a lower proportion of juveniles (Figure S1(A)) and a higher  
274 proportion of adults (Figure S1(B)) in the population compared to less fit strategies. As life histories evolve to be  
275 faster, with smaller body sizes, we observe negative covariances between both juvenile (Figure S1(C)) and adult  
276 survival (Figure S1(D)) and the adult reproductive rate, with positive covariances observed in the parameter space  
277 where large bodied sized, slower life histories evolve. As expected, evolution minimized adult per-capita reproduction,  
278 the density-dependent rate (Figure S1(E)). There was a positive covariance between juvenile and adult survival rates  
279 across life histories (Figure S1(F)), with positive covariances between both survival rates and reproduction in the  
280 regime of parameter space where fast life histories evolve, and negative covariances in the regime where slower life  
281 histories were selected (Figures S1(G,H)).

282 In scenario 2, in the parameter space where slower, larger-bodied life histories were selected, fitter strategies tended  
283 to have a greater proportion of juveniles in the population (Figure S2(A)). In contrast, when fast life histories were  
284 selected, the fitter strategies tended to have a high proportion of adults in the population (Figure S2(B)). These

285 patterns stem from our general observation of evolution minimizing density-dependent terms while maximizing  
286 density-independent ones. The association between juvenile survival and carrying capacity was highly non-linear  
287 (Figure S2(C)). When fast life histories were selected, adult survival rates negatively covaried with carrying capacity  
288 (Figure S2(D)), while the opposite was observed when slower life histories were selected. Because reproductive rate  
289 was a constant, it did not covary with carrying capacity (Figure S2(E)), or other rates (Figure S2(G,H)). There was a  
290 highly non-linear association between juvenile and adult survival rates (Figure S2(F)).

## 291 **Life History Dynamics for Scenario 1, Density-dependent Reproduction**

292 Although exploration of the per-time step demographic rates did not allow us to gain general insight into where life  
293 history trade-offs underpinning selection on body size lie, analysis of the survivorship schedules does. Holding the  
294 size-survival function constant (Figure 1(D)), but altering the development function (Figure 1(B,C)), inevitably  
295 changes the survivorship functions: the probability of surviving from birth to a particular age (Figure 3(A)). The  
296 faster that individuals grow, the more quickly they progress along the  $x$ -axis of the body size-survival function  
297 (Figure 1(D)), and this means that their probability of surviving at each age increases when going from fast-lived to  
298 slow-lived life histories.

299 The change in the development function, and in size and age at sexual maturity, generates variation in the probability  
300 of an individual surviving to sexual maturity across life histories (Figure 3(B)). A smaller proportion of each cohort  
301 achieves sexual maturity as size at sexual maturity increases because it takes longer to achieve sexual maturity, and  
302 this delay imposes a greater mortality burden on each cohort than the survival benefits accrued via achieving larger  
303 sizes at a particular juvenile age (Figure 1(C)). The mortality cost of delaying sexual maturity can be offset by an  
304 increase in life expectancy at sexual maturity (Figure 3(C)) as larger adults have higher per-time step survival rates  
305 than those that are smaller (Figure 3(D)) and consequently live for longer.

306 Below a threshold (green line in Figure 3(B-E)) the proportion of the population achieving sexual maturity decreases  
307 at a relatively faster rate than the corresponding increase in life expectancy, with the converse true above the  
308 threshold. A consequence of these contrasting rates of change is that the proportion of sexually mature individuals  
309 within the population can increase (Figure 3(D)), even though a smaller proportion of each cohort achieves sexual  
310 maturity (Figure 3(B)), simply because a greater number of cohorts are alive as adults at any one time as adult life  
311 expectancy increases. Once individuals achieve sexual maturity, they reproduce.

312 The switch in the relative sizes of the derivative of the proportion of each cohort surviving to sexual maturity  
313 to size at sexual maturity, and the derivative of life expectancy to size at sexual maturity, generates disruptive  
314 selection. We observe an “n”-shaped association between size at sexual maturity and the per-capita reproductive  
315 rate (Figure 3(E)), which is reflected in a mirror-image “u”-shaped association between size at sexual maturity and  
316 carrying capacity (Figure 2(A)). The constraint  $R_0 = 1$  means that the minimization of the density-dependent

317 term in the density-dependent reproduction function must be countered by maximization of values predicted by  
318 the density-independent body size term in the survivorship function. Because the survivorship function determines  
319 both the proportion of each cohort that achieves sexual maturity, and life expectancy at sexual maturity, and given  
320 equation (8), we observe a linear association with a slope of  $-1$  between the log of the product of survivorship to  
321 sexual maturity and life expectancy at sexual maturity with the log of the per-capita reproductive rate (Figure 3(F)).

322 We can now understand why we observe disruptive selection on size at sexual maturity (and life history speed).  
323 Below the threshold of minimum fitness (vertical green dotted lines in Figure 3), the density-independent body size  
324 term in the survival function is maximized by maximizing the proportion of each cohort that survives to sexual  
325 maturity. This is achieved by selecting for an ever-earlier size at sexual maturity to minimize the amount of mortality  
326 between birth and sexual maturity. In contrast, above this threshold, the density-independent survival term is  
327 maximized by maximizing life expectancy at sexual maturity, and this is achieved by selecting for an increase in size  
328 at sexual maturity.

329 In Figure 4 we illustrate how density-dependent and density-independent functions can change with age as described  
330 above to ensure the constraint  $R0 = \int_{a=0}^{\infty} L(a, K)R(a, K)da = 1$  and impose selection on size at sexual maturity.  
331 The summary figure does not include body size because its inclusion complicates visual interpretation (Figure S3).  
332 The figure shows how a change in age at sexual maturity (4(A) versus 4(B)) results in a change in the form of the  
333 survivorship function, which results in a change in the elevation of the density-dependent reproductive function to  
334 ensure  $R0 = 1$ . The life history in Figure 4(B) is favoured by selection in this example because the density-dependent  
335 reproductive function is at a lower elevation than in Figure 4(A). Figure 4(C) provides an explanation of the rectangle  
336 approximation used in equation (6).

### 337 **Life History Dynamics for Scenario 2, Density-dependent Juvenile Survival**

338 We now consider the case where juvenile survival is density-dependent; in contrast to the reproduction function,  
339 survival is also dependent on body size. Reproduction is now density-independent and  $\rho_N = 0$ . A consequence of  
340 these changes is the form of the survival and survivorship functions now differ compared with scenario 1 (compare  
341 Figures 5(A, B) with Figures 2(D) and 3(A)). The density-independent rate that is now maximized is adult survival.  
342 Per-capita reproduction cannot be maximized as it does not vary with life history (because  $\rho_z = 0$  and  $\rho_N = 0$ ).

343 As before, the proportion of each cohort achieving sexual maturity declines with increasing size at sexual maturity  
344 (Figure 5(C)), while life expectancy increases (Figure 5(D)). These processes combine to generate a quadratic  
345 association between size at sexual maturity and the proportion of the population that is sexually mature (Figure  
346 5(E)). The same maximization of  $K$ , and minimization of the density-dependent term occurs as in scenario 1, except  
347 the demographic rate that is modified is now  $S(z < z_a, N, t)$  (rather than  $R(z, N, t)$ ), and the term being minimized  
348 is now  $\beta_0 + \beta_N K$  (rather than  $\rho_0 + \rho_N K$ ). The density-independent life history quantity that is now maximized is

349 adult life expectancy (Figure 5(D)).

350 There is one significant difference compared to scenario 1: survival ( $\beta_z > 0$ ), unlike reproduction ( $\rho_z = 0$ ), is a  
351 function of body size. Because the development function varies across life histories along with size at sexual maturity,  
352 mean juvenile body size, and consequently mean juvenile survival, also varies with life history. A consequence of  
353 juvenile survival being influenced by both density and body size, and mean juvenile body size varying across life  
354 histories, is that the life history with minimum fitness does not align with the life history that has the maximum  
355 per-capita juvenile survival rate (Figure 5(F)). This does not affect the negative linear association between the logs  
356 of the density-independent and density-dependent rates (Figure 5(G)).

## 357 **Changing the survival function**

358 The reason why the proportion of each cohort that achieves sexual maturity and life expectancy at sexual maturity  
359 change at different rates across life histories in the models, generating disruptive selection on size at sexual maturity,  
360 is the non-linear form of the size-survival function, and the rate at which survival changes with size (and age). The  
361 elevation and slope of the size-survival function should consequently determine the shape of selection on life history.  
362 We examined this for scenario 1 by systematically modifying the two parameters (Figure 6).

363 When the slope of the body-size survival function is 0 we never observe selection for delayed age and size at sexual  
364 maturity and a slower life history (column 1). In order to see selection for an increase in size at sexual maturity,  
365 survival rates need to increase with body size (positive viability selection) and need to be sufficiently high for sexually  
366 mature adults to extend lifespan sufficiently to offset the costs of a smaller proportion of offspring surviving to sexual  
367 maturity (see equation (6)). It is this fitness differential across ages that determines whether there will be selection  
368 for an increase or decrease in body size and age at sexual maturity.

369 We also investigated whether our results remained when we linearised approxated the model (Appendix 1). They  
370 did, revealing that the patterns are not a consequence of the weak non-linearities in our simulations.

## 371 **Discussion**

372 We explore circumstances under which extremes of body size and life history speed are expected to evolve. We  
373 assumed a density-dependent environment, because, over evolutionary time, populations do not show persistent,  
374 long-term temporal trends in numbers (Coulson 2021). Despite the simplicity of the models we develop, the results  
375 reveal several novel insights.

## 376 Why do extremes of body size evolve?

377 Although our models have only one function being density-dependent, and the only way for evolution to maximize  
378 density-independent functions is via modification of the developmental trajectories, we found areas of parameter  
379 space where small-bodied, fast life histories evolved and other areas where the converse was true. Our results reveal  
380 that if delaying age at sexual maturity also increases size at sexual maturity, and this increases the mortality rate  
381 between birth and sexual maturity, then we would expect smaller-bodied, fast life histories to evolve unless this  
382 increased juvenile fitness cost was offset by an increase in adult fitness (see also Stearns & Koella (1986)). In the  
383 models we develop, the increase in adult fitness came via an extension to adult lifespan. However, it could also  
384 come via an increase in per-capita per-time step reproductive output (Kozłowski *et al.* 2020), which could occur if  
385 reproduction increased with body size as is observed in some species (Barneche *et al.* 2018). Although negative  
386 density-dependence can operate in any demographic rate (Eberhardt 2002), we focused on reproduction and juvenile  
387 survival as this is where it appears to operate most frequently (Bonenfant *et al.* 2009).

388 The simple models we develop predict runaway disruptive selection – in other words, all species should evolve to  
389 be either dwarfs or giants. This does not happen, so some process must prevent such runaway selection. At the  
390 extremes, it seems plausible that physiological or metabolic constraints impose maximum and minimum sizes (West  
391 *et al.* 1997), but what prevents runaway selection in animals of intermediate size? We show that once survival rates  
392 plateau with size, then selection for an increase in size at sexual maturity ceases. In other words, once survival rates  
393 plateau, there are no longer adult fitness gains available via delaying sexual maturity to extend life expectancy.

394 One process that results in survival decreasing with age is senescence. It is important to note that we do not  
395 incorporate senescence into models, but given its ubiquitous nature (Nussey *et al.* 2013), it seems plausible that  
396 senescence means that survival rates cannot remain indefinitely high among adults. Depending on the age at which  
397 senescence begins, and how quickly it happens, there could be a trade-off between rates of development, the shape of  
398 the size-survivorship function, and the onset of senescence (Jones *et al.* 2008). Future work should incorporate the  
399 effects of both age and body size on survival and reproduction (and offspring size (Charnov & Downhower 1995))  
400 into models to explore the conditions under which runaway selection for ever-smaller, or -larger, body size can be  
401 constrained.

## 402 Minimization, Maximization and the Emergence of Trade-offs

403 The minimization of some demographic terms and the maximization of others in the models we develop generate  
404 within- and between-age trade-offs. These are evident in the life history rates, but are not apparent in the per-time  
405 step demographic rates used to describe the population dynamics. We start by considering the life history rates.

406 In scenario 1, where the density-dependent feedback operates via reproduction, the minimization of terms in the  
407 reproductive function results in either maximization of juvenile or adult survival rates via the survivorship functions



408 depending on whether the relative rate of change in the proportion of each cohort achieving sexual maturity, or life  
409 expectancy at sexual maturity, changes fastest with size at sexual maturity. Put another way, the absolute values  
410 of the sensitivities of the proportion of each cohort achieving sexual maturity to size at sexual maturity, and life  
411 expectancy to size at sexual maturity, determine the direction of selection. We can consequently observe negative  
412 covariances (trade-offs) between juvenile survivorship and adult reproduction, but also between adult life expectancy  
413 and adult reproduction.

414 These trade-offs are most easily understood via examination of the changing shapes of the survivorship and  
415 reproductive schedules (Stearns 1977) rather than via the population dynamic rates. The main reason for this is we  
416 can describe life histories with three rates – the proportion of each cohort surviving to sexual maturity (which is  
417 equal to survivorship to sexual maturity), life expectancy at sexual maturity, and the adult per-capita reproductive  
418 rate. With only three terms to work with, it is (relatively) straightforward to identify trade-offs. In contrast, the  
419 description of the population dynamics we use involves five terms – the proportion of juveniles in the population,  
420 the proportion of adults in the population, the per-time step juvenile survival rate, the per-time step adult survival  
421 rate, and the adult per-capita reproductive rate. Because these change in different ways and at different rates with  
422 size at sexual maturity, identifying trade-offs by examining negative covariances between pairs of rates becomes  
423 impossible. This result highlights the challenge of identifying trade-offs from demographic rate data underpinning  
424 population dynamics (Tavecchia *et al.* 2005).

425 The life history description we use in terms of survivorship and reproductive schedules does not explicitly include  
426 information on the population structure, and this simplifies the challenge of identifying the trade-offs that emerge as  
427 we only work with three terms. At one level the approach we develop is general, as all life histories can be divided  
428 into juvenile and adult age-classes as a function of whether individuals are sexually mature or not. By setting the  
429 reproductive rate as a constant in adults, rather than having it vary with body size as it does in many species  
430 (Barneche *et al.* 2018), we could easily reformulate the Euler-Lotka relationship in a way that allows us to summarize  
431 the adult survivorship schedule as life expectancy – the average of this schedule. It should always be possible to  
432 rectangularize the product of the survivorship and fertility schedules post-sexual maturity into life expectancy and  
433 average per-time adult reproductive rate given survivorship to sexual maturity, so the approach is general. However,  
434 a more nuanced understanding, particularly when senescence is included, would usefully involve sensitivities of life  
435 expectancy and adult reproductive output to survivorship and reproductive output at each age and size given size at  
436 sexual maturity (Tuljapurkar *et al.* 2009; Steiner *et al.* 2012; Jones & Tuljapurkar 2015).

437 Age-class-specific survival rates are determined by the shape of the size-survival function and the development  
438 function (Tuljapurkar *et al.* 2009). In many species, per-time step survival rates increase with body size (Ronget *et*  
439 *al.* 2018), so the functional form we chose for these functions is appropriate. However, how these functions translate  
440 into survivorship functions depends upon the form of the development functions. If the development function



441 was density-dependent, such that the rate of development decreased with density, then as density increased, the  
442 survivorship curves will change, even for a constant size-survival function, simply because individuals will develop  
443 more slowly. All other things being equal, this would be expected to select for a smaller-sized, faster life history, as  
444 a smaller proportion of each cohort would survive to sexual maturity. Development rates consequently indirectly  
445 determine the life history by determining how quickly survival rates change with age. Development rates vary  
446 with age as a function of the environment in many species, and are described by reaction norms (Stearns & Koella  
447 1986; Murren *et al.* 2014). When density is low, and resources are abundant, or at ideal temperature conditions in  
448 ectotherms, body size can develop quickly, while rates are lower when food is scarce or temperature is away from the  
449 optima (Day & Rowe 2002). One key question that arises is whether the size-survival function will also change as  
450 environmental variables change? In many species, it appears to do so, potentially because rates of development of  
451 traits other than body size are also influenced by the environment (Gaillard *et al.* 2000). Understanding covariation  
452 between phenotypic trait-survival function and development rate functions would allow us to extend the approach to  
453 cases where we do not assume a constant survival function across life histories.

454 We kept offspring size constant in models. However, changing offspring size could also impact life history evolution  
455 (Winkler & Wallin 1987; Reznick *et al.* 1990; Charnov & Downhower 1995). First, if carrying capacity measured in  
456 total number of individuals is fitness, and density-dependence operates via reproduction, then reducing litter size  
457 while increasing offspring size is one route to evolving a lower per-capita reproductive rate allowing persistence at a  
458 higher carrying capacity. Second, larger offspring begin life further along the body size-survival function, potentially  
459 increasing the proportion of each cohort that survives to sexual maturity, altering the strength of selection on  
460 size at sexual maturity and life history speed. As we increase the degrees of freedom via which survivorship and  
461 reproductive schedules can be altered, we reduce the constraints on how species may respond to environmental  
462 change. Nonetheless, working in situations where carrying capacity is fitness imposes a constraint that will generate  
463 trade-offs, and the approach we develop provides a way to identifying the types of trade-offs that might emerge as a  
464 function of the part of the life history where density-dependence operates most strongly.

## 465 **Carrying Capacity as Fitness**

466 Density-dependence can be generated by any limiting resource, and this means we can interpret fitness as being  
467 determined by a number of different limiting factors. In this section we consider the biological interpretation of  
468 carrying capacity as fitness.

469 The mechanism via which density-dependence impacts life history evolution in the models we develop is to minimize  
470 density-dependent terms in demographic functions when evaluated at  $K$ . If per-capita reproduction in strategies  
471  $A$  and  $B$  is influenced in the same manner by density, the life history strategy that can persist with the lowest  
472 per-capita reproductive rate for any given value of  $z$  is the fittest. Evolution acts to minimize the sensitivity of the

473 demographic rate to population density.

474 Carrying capacity is often defined as the total number of individuals a particular environment can support (Turchin  
475 1999). However, it can be specified in other ways. What if total biomass, e.g.  $\int_0^\infty zN(z, K, t)dz$ , is a better descriptor  
476 of the density-dependent feedback (Owen-Smith 2002) than just total population size at equilibrium? Fitness is  
477 now total biomass, and evolution will maximize biomass and will minimize the value of the terms in demographic  
478 functions that include biomass. We can extend this logic further to cases where individuals with different values of  
479 a phenotypic trait, such as body size, impose different competitive pressures on one another (Bolker *et al.* 2003).  
480  $K$  can now be defined as the sum of the product of a pairwise trait-mediated interaction surface with the density  
481 distribution of conspecifics with each trait value (Bassar *et al.* 2016). The pairwise interaction surface describes the  
482 competitive impact of an individual with trait value  $z_i$  on an individual with trait value  $z_j$  across all values of  $i, j$ ,  
483 scaled such that two individuals with the same value of the trait impose a competitive pressure on one another of  
484 unity (McCoy & Bolker 2008). The life history strategy that can persist at the highest value of the term describing  
485 this more complex negative feedback will be the fittest (Bassar *et al.* 2016).  $K$  is consequently defined here as being  
486 more nuanced than the total number of individuals in a population at equilibrium.

487 Density-dependence (and consequently carrying capacity) is used as a shortcut to summarize intraspecific competitive  
488 interactions for a shared resource, trophic interactions such as predation or herbivory that lead to competition,  
489 or indirect interspecific competitive interactions (Hassell 1986). A consequence of this is we can replace density  
490 feedbacks with other terms, such that carrying capacity can become a function of the number, and/or population  
491 structure, of other species (Bagchi *et al.* 2010). For example, the trait-mediated interaction surface and the density  
492 distribution of trait values among conspecific competitors described above can be modified to capture interspecific  
493 competition. In communities of indirectly competing species on the same trophic level, the strength of species  
494 interactions can be characterized with interaction coefficients describing the competitive impact of one individual of  
495 species  $A$  on an individual of species  $B$  (Hofbauer *et al.* 1987; Allesina & Tang 2012). A species interaction matrix,  
496 similar to the trait interaction surface, and the distribution of individuals in each competing species can now be used  
497 to calculate a quantity that is an interspecific definition of  $K$ . If the phenotypic trait structure of an interacting  
498 species influences the outcome of interspecific interactions, then this too could be incorporated into models via a more  
499 complex definition of  $K$  (Bassar *et al.* 2017). This naturally allows the effect of different competitive environments  
500 on life history evolution to be explored.

501 Interspecific competition describes indirect interactions via a shared resource, but we can also define  $K$  for directly  
502 interacting species. When we know what the limiting process is, we can replace carrying capacity with an expression  
503 describing the strength of the trophic interaction (Adler *et al.* 2010). For example, in a predator-limited population  
504 we might now write an equation for a demographic rate influenced by the equilibrium number of predators  $P$  as  
505  $V(z, P) = \nu_0 + \nu_z z + \nu_P P$  where  $\nu_P < 0$ . Evolution will now maximize the value of  $P$ , minimizing the value of

506  $V(z, P)$ . Biologically this means that in a predation-limited environment evolution is selecting for life histories that  
507 can persist at the highest predator densities. We could now construct a dynamic model of a focal prey and its  
508 predator population, and examine how a life history evolves in response to changing the way predation operates.

509 The effect of the number of predators on a focal population is determined by a negative parameter (in the  
510 example above,  $\nu_P$ ). In a food-limited population, where  $\Phi$  is the equilibrium availability of food, we might write  
511  $V(z, \Phi) = \omega_0 + \omega_z z + \omega_\Phi \Phi$  where  $\omega_\Phi > 0$ . In this case, evolution will act to minimize food availability  $\Phi$ , maximizing  
512 the value of the function  $V(z, \Phi)$ . The fittest life history strategy is now the one that can survive on the least amount  
513 of food, with the resulting dynamic being equivalent to Tilman's  $R^*$  concept (Tilman 1982). Energy availability  
514 could be substituted for food, allowing models to be extended to examine circumstances when metabolic scaling  
515 rules might emerge.

516 These insights into the definition of fitness are important as we can now define fitness for dynamic models of directly  
517 and indirectly interacting species at equilibrium, with fitness being equal to the population size and/or structure  
518 (or biomass) of the species directly imposing the feedback. This aids understanding of how species are expected to  
519 adapt to environments via phenotypic trait evolution. For example, in environments where predation determines the  
520 feedback, evolution will select traits that enable prey to live with predators (Coulson 2021). Such traits might be  
521 camouflaged coloration, social living, anti-predator behaviors, and morphological characteristics that aid escape  
522 from predators (Reznick & Endler 1982).

523 In the discussion to date (and in our models), we have assumed each life history strategy must be influenced by  
524 the same fitness metric,  $K$ , whether it is calculated as a function of the distribution of intraspecific competitors,  
525 interspecific competitors, or trophically interacting species, or even a mixture. What if each life history strategy  
526 has a different definition of  $K$ ? Under this scenario, we can draw on insight from modern coexistence theory, and  
527 the role of fitness differences on coexistence (Chesson 2000). When fitness is defined differently for two different  
528 life history strategies, they will exhibit fitness differences that arise from niche differentiation, and this provides a  
529 pathway to coexistence. Appreciating that in some circumstances fitness can be defined as a property of interacting  
530 species opens the possibility of more formal links between ecology, which aims to understand species interactions,  
531 and evolution, which is concerned with within-population change.

## 532 **Empirical Considerations**

533 Our work is theoretical, but it leads to a number of hypotheses that could be empirically tested. We show that the  
534 shapes of the four function types used to construct models determine whether small-bodied and fast, or large-bodied  
535 and slow, life histories are selected. To understand why a particular body size and life history evolves, it is  
536 consequently insightful to explore why the survival, development, reproduction, and inheritance functions take the  
537 shapes they do, and how they covary. What are the genetic, physiological, or environmental factors that determine

538 the size-survival function, for example (Coulson 2021)? As a population adapts to a new environment, the strength  
539 and form of feedbacks may change, and this will be reflected in the way the functions that constitute models change  
540 as adaptation occurs. Not only will this help us understand phenotypic trait and life history evolution, but also the  
541 way that the population dynamics change as adaptation occurs as these are easily studied using IPMs. Understanding  
542 why we see particular functional forms, and how these change as adaptation progresses will provide novel insight,  
543 but the approach also has the potential to help explain a number of evolutionary “rules”.

544 There are three main biogeographical “rules” describing patterns of body size: the island rule, Bergmann’s rule, and  
545 Cope’s rule. The island rule states that small species of many mammals and birds tend to evolve large body sizes  
546 and slower life histories on islands, while larger species tend to evolve in the other direction (Clegg & Owens 2002;  
547 Lomolino 2005; Covas 2012; Sandvig *et al.* 2019). Bergmann’s rule states that an increase in latitude typically  
548 corresponds to an increase in adult body sizes within species (McNab 1971). Cope’s rule states that species tend  
549 to get larger over evolutionary time (Hone & Benton 2005), suggesting a similar process could well be happening  
550 over time as happens with latitude. These patterns suggest systematic changes in the shapes of size-survival,  
551 size-reproduction, development rates, and offspring size may underpin these “rules”. Additional work, where we  
552 impose fewer constraints on the functions in models, should help explain the circumstances required to generate  
553 these body size and life history patterns.

554 We can even hypothesize on the shape of the functions in extinct species, such as the giant sauropods. These giants  
555 are thought to have laid multiple clutches of relatively few ostrich egg-sized eggs, have very high early growth rates,  
556 and to achieve sexual maturity at around 50-70 years (Sander *et al.* 2011). The high growth rates suggested the  
557 young were unlikely food-limited, and selection for very large size suggests a steep increase in survival rates across  
558 the range of sizes through which they developed. Taken together, these suggest a high mortality rate on the young,  
559 likely via predation, but long life expectancies once sexual maturity was achieved.

## 560 **Limitations and Next Steps**

561 One obvious limitation of the models we develop is they do not include environmental stochasticity. One effect of  
562 environmental stochasticity is to periodically reduce population size such that feedbacks do not strongly operate. For  
563 example, in a model with density-dependent feedback, environmental stochasticity may result in periodic declines in  
564 population size when the feedback has little impact on the demographic rates via which it operates. The population  
565 will now undergo a period of rapid, stochastic growth, until the feedback starts to operate again to limit population  
566 size (Lande *et al.* 2009). During the period when the feedback is not operating, trade-offs will be negligible as  
567 no rates are being minimized, and the fittest life history strategy will be the one that can maximize the most  
568 demographic rates, and will consequently always be the one with the highest stochastic growth rate (Tuljapurkar  
569 1990). This will always select for a fast life history with a small body size. In a stochastic environment with

570 feedbacks, and a stationary distribution of population size, the fittest life history strategy will consequently depend  
571 upon the proportions of time the population is subject to the feedback operating strongly, and the proportion of time  
572 they are largely absent (Schreiber 2021). More specifically, there will exist a frequency distribution of the strength  
573 of the feedback, and this will determine the evolutionarily stable life history strategy in a stochastic environment  
574 with feedbacks. There has been significant work incorporating stochasticity into modern coexistence theory, and this  
575 could help with extending our approach to stationary stochastic environments.

## 576 Conclusions

577 There are many ways in which the models we use can be extended and parameterized to address a range of empirical  
578 and theoretical questions about body size and life history evolution. Our work also contributes to a general framework  
579 that we have been developing where we consider natural systems as attaining quasi-stationary states from which they  
580 can be perturbed before starting an eco-evolutionary journey to a new stationary state (Coulson *et al.* 2011, 2017).  
581 The journey can be characterized with dynamical change in the form of the fundamental demographic functions  
582 used to construct models. Work to date with integral projection models has primarily focused on the dynamics  
583 of phenotypic traits (Coulson *et al.* 2010), genes (Coulson *et al.* 2011), and population (Ellner *et al.* 2016) and  
584 community dynamics (Adler *et al.* 2010). The work we report here shows how life history evolution can be examined  
585 using models within the framework we are developing, and insights extended to modern coexistence theory, and  
586 trophic interactions. Integral Projection Models provide a remarkably powerful suite of tools to address a vast array  
587 of questions in population and community ecology, life history and quantitative trait evolution (Ellner *et al.* 2016).  
588 The next empirical set of questions we will explore will examine whether this class of model performs as well in  
589 shedding light on life history evolution as they have on ecological dynamics and phenotypic trait evolution.

## 590 Acknowledgements

591 Thanks to Luke Coulson for running simulations over a range of parameter values. Thanks to Mike Furlong and  
592 the School of Biological Sciences at the University of Queensland for hosting TC's and SC's sabbaticals where the  
593 work was largely conducted. RDB is supported by NSF DEB2100163; Travis is supported by National Science  
594 Foundation award DEB 2100163; GP is funded by the UK's Natural Environment Research Council through the  
595 Doctoral Training Partnership in Environmental Research at the University of Oxford (NE/L002612/1);

## 596 References

- 597 Adler, P.B., Ellner, S.P. & Levine, J.M. (2010). Coexistence of perennial plants: An embarrassment of niches. *Ecol.*  
598 *Lett.*, 13, 1019–1029.
- 599 Allesina, S. & Tang, S. (2012). Stability criteria for complex ecosystems. *Nature*, 483, 205–208.

- 600 Audzijonyte, A., Richards, S.A., Stuart-Smith, R.D., Pecl, G., Edgar, G.J., Barrett, N.S., *et al.* (2020). Fish body  
601 sizes change with temperature but not all species shrink with warming. *Nat. Ecol. Evol.*, 4, 809–814.
- 602 Bagchi, R., Swinfield, T., Gallery, R.E., Lewis, O.T., Gripenberg, S., Narayan, L., *et al.* (2010). Testing the  
603 Janzen-Connell mechanism: Pathogens cause overcompensating density dependence in a tropical tree. *Ecol. Lett.*,  
604 13, 1262–1269.
- 605 Barneche, D.R., Robertson, D.R., White, C.R. & Marshall, D.J. (2018). Fish reproductive-energy output increases  
606 disproportionately with body size. *Science*, 360, 642–645.
- 607 Bassar, R.D., Childs, D.Z., Rees, M., Tuljapurkar, S., Reznick, D.N. & Coulson, T. (2016). The effects of asymmetric  
608 competition on the life history of trinidadian guppies. *Ecol. Lett.*, 19, 268–278.
- 609 Bassar, R.D., Travis, J. & Coulson, T. (2017). Predicting coexistence in species with continuous ontogenetic niche  
610 shifts and competitive asymmetry. *Ecology*, 98, 2823–2836.
- 611 Bolker, B., Holyoak, M., Křivan, V., Rowe, L. & Schmitz, O. (2003). Connecting theoretical and empirical studies of  
612 trait-mediated interactions. *Ecology*, 84, 1101–1114.
- 613 Bonenfant, C., Gaillard, J.-M., Coulson, T., Festa-Bianchet, M., Loison, A., Garel, M., *et al.* (2009). Empirical  
614 evidence of density-dependence in populations of large herbivores. *Adv. Ecol. Res.*, 41, 313–357.
- 615 Caswell, H. (2001). *Matrix population models: Construction, analysis, and interpretation*. Sinauer Associates.
- 616 Charlesworth, B. (1994). *Evolution in age-structured populations*. Cambridge University Press Cambridge.
- 617 Charnov, E.L. & Downhower, J.F. (1995). A trade-off-invariant life-history rule for optimal offspring size. *Nature*,  
618 376, 418–419.
- 619 Chesson, P. (2000). Mechanisms of maintenance of species diversity. *Annu. Rev. Ecol. Syst.*, 31, 343–366.
- 620 Childs, D.Z., Rees, M., Rose, K.E., Grubb, P.J. & Ellner, S.P. (2004). Evolution of size-dependent flowering in a  
621 variable environment: Construction and analysis of a stochastic integral projection model. *Proc. Roy. Soc. B.*,  
622 271, 425–434.
- 623 Clegg, S.M. & Owens, P. (2002). The ‘island rule’ in birds: Medium body size and its ecological explanation. *Proc.*  
624 *Roy. Soc. B.*, 269, 1359–1365.
- 625 Coulson, T. (2012). Integral projections models, their construction and use in posing hypotheses in ecology. *Oikos*,  
626 121, 1337–1350.
- 627 Coulson, T. (2021). Environmental perturbations and transitions between ecological and evolutionary equilibria: An  
628 eco-evolutionary feedback framework. *Peer Community Journal*, 1.
- 629 Coulson, T., Benton, T., Lundberg, P., Dall, S., Kendall, B. & Gaillard, J.-M. (2006). Estimating individual  
630 contributions to population growth: Evolutionary fitness in ecological time. *Proc. Roy. Soc. B.*, 273, 547–555.
- 631 Coulson, T., Kendall, B.E., Barthold, J., Plard, F., Schindler, S., Ozgul, A., *et al.* (2017). Modeling adaptive and  
632 nonadaptive responses of populations to environmental change. *Am. Nat.*, 190, 313–336.
- 633 Coulson, T., MacNulty, D.R., Stahler, D.R., VonHoldt, B., Wayne, R.K. & Smith, D.W. (2011). Modeling effects of

- 634 environmental change on wolf population dynamics, trait evolution, and life history. *Science*, 334, 1275–1278.
- 635 Coulson, T., Tuljapurkar, S. & Childs, D.Z. (2010). Using evolutionary demography to link life history theory,  
636 quantitative genetics and population ecology. *J. Anim. Ecol.*, 79, 1226–1240.
- 637 Covas, R. (2012). Evolution of reproductive life histories in island birds worldwide. *Proc. Roy. Soc. B.*, 279,  
638 1531–1537.
- 639 Day, T. & Rowe, L. (2002). Developmental thresholds and the evolution of reaction norms for age and size at  
640 life-history transitions. *Am. Nat.*, 159, 338–350.
- 641 Day, T. & Taylor, P.D. (1997). Von Bertalanffy’s growth equation should not be used to model age and size at  
642 maturity. *Am. Nat.*, 149, 381–393.
- 643 Depczynski, M. & Bellwood, D.R. (2005). Shortest recorded vertebrate lifespan found in a coral reef fish. *Curr.*  
644 *Biol.*, 15, R288–R289.
- 645 Dieckmann, U., Heino, M. & Parvinen, K. (2006). The adaptive dynamics of function-valued traits. *J. Theor. Biol.*,  
646 241, 370–389.
- 647 Eberhardt, L. (2002). A paradigm for population analysis of long-lived vertebrates. *Ecology*, 83, 2841–2854.
- 648 Ellner, S.P., Childs, D.Z. & Rees, M. (2016). *Data-driven modelling of structured populations: A practical guide to*  
649 *the integral projection model*. Springer.
- 650 English, S., Bateman, A.W. & Clutton-Brock, T.H. (2012). Lifetime growth in wild meerkats: Incorporating life  
651 history and environmental factors into a standard growth model. *Oecologia*, 169, 143–153.
- 652 Fisher, S., Ronald Aylmer. (1930). *The genetical theory of natural selection*. Clarendon Press, Oxford.
- 653 Gaillard, J.-M., Festa-Bianchet, M., Yoccoz, N., Loison, A. & Toigo, C. (2000). Temporal variation in fitness  
654 components and population dynamics of large herbivores. *Annu. Rev. Ecol. Syst.*, 31, 367–393.
- 655 Gaillard, J.-M., Pontier, D., Allaine, D., Loison, A., Herve, J.-C. & Heizman, A. (1997). Variation in growth form  
656 and precocity at birth in eutherian mammals. *Proc. Roy. Soc. B.*, 264, 859–868.
- 657 Grafen, A. (1999). Formal darwinism, the individual-as-maximizing-agent analogy and bet-hedging. *Proc. Roy.*  
658 *Soc. B.*, 266, 799–803.
- 659 Grant, A. (1997). Selection pressures on vital rates in density-dependent populations. *Proc. Roy. Soc. B.*, 264,  
660 303–306.
- 661 Hassell, M.P. (1986). Detecting density dependence. *Trends Ecol. Evol.*, 1, 90–93.
- 662 Hofbauer, J., Hutson, V. & Jansen, W. (1987). Coexistence for systems governed by difference equations of  
663 lotka-volterra type. *J. Math. Biol.*, 25, 553–570.
- 664 Hone, D.W. & Benton, M.J. (2005). The evolution of large size: How does Cope’s Rule work? *Trends Ecol. Evol.*,  
665 20, 4–6.
- 666 Jones, J.H. & Tuljapurkar, S. (2015). Measuring selective constraint on fertility in human life histories. *P. Natl.*  
667 *Acad. Sci. USA.*, 112, 8982–8986.



- 668 Jones, O.R., Gaillard, J.-M., Tuljapurkar, S., Alho, J.S., Armitage, K.B., Becker, P.H., *et al.* (2008). Senescence  
669 rates are determined by ranking on the fast–slow life-history continuum. *Ecol. Lett.*, 11, 664–673.
- 670 Kentie, R., Clegg, S.M., Tuljapurkar, S., Gaillard, J.-M. & Coulson, T. (2020). Life-history strategy varies with the  
671 strength of competition in a food-limited ungulate population. *Ecol. Lett.*, 23, 811–820.
- 672 Kingsolver, J.G., Hoekstra, H.E., Hoekstra, J.M., Berrigan, D., Vignieri, S.N., Hill, C., *et al.* (2001). The strength  
673 of phenotypic selection in natural populations. *Am. Nat.*, 157, 245–261.
- 674 Kooijman, B. & Kooijman, S. (2010). *Dynamic energy budget theory for metabolic organisation*. Cambridge  
675 University Press.
- 676 Koziowski, J. & Weiner, J. (1997). Interspecific allometries are by-products of body size optimization. *Am. Nat.*,  
677 149, 352–380.
- 678 Kozłowski, J. (1992). Optimal allocation of resources to growth and reproduction: Implications for age and size at  
679 maturity. *Trends Ecol. Evol.*, 7, 15–19.
- 680 Kozłowski, J., Konarzewski, M. & Czarnoleski, M. (2020). Coevolution of body size and metabolic rate in vertebrates:  
681 A life-history perspective. *Biol. Rev.*, 95, 1393–1417.
- 682 Lachish, S., Brandell, E.E., Craft, M.E., Dobson, A.P., Hudson, P.J., MacNulty, D.R., *et al.* (2020). Investigating the  
683 dynamics of elk population size and body mass in a seasonal environment using a mechanistic integral projection  
684 model. *Am. Nat.*, 196, E23–E45.
- 685 Lande, R., Engen, S. & Saether, B.-E. (2009). An evolutionary maximum principle for density-dependent population  
686 dynamics in a fluctuating environment. *Philos. T. Roy. Soc. B.*, 364, 1511–1518.
- 687 Law, R. (1979). Optimal life histories under age-specific predation. *Am. Nat.*, 114, 399–417.
- 688 Lomolino, M.V. (2005). Body size evolution in insular vertebrates: Generality of the island rule. *J. Biogeogr.*, 32,  
689 1683–1699.
- 690 McCoy, M.W. & Bolker, B.M. (2008). Trait-mediated interactions: Influence of prey size, density and experience. *J.*  
691 *Anim. Ecol.*, 478–486.
- 692 McGraw, J.B. & Caswell, H. (1996). Estimation of individual fitness from life-history data. *Am. Nat.*, 147, 47–64.
- 693 McNab, B.K. (1971). On the ecological significance of Bergmann’s Rule. *Ecology*, 52, 845–854.
- 694 Merilä, J., Sheldon, B. & Kruuk, L. (2001). Explaining stasis: Microevolutionary studies in natural populations.  
695 *Genetica*, 112, 199–222.
- 696 Meszina, G., Kisdi, E., Dieckmann, U., Geritz, S.A. & Metz, J.A. (2002). Evolutionary optimisation models and  
697 matrix games in the unified perspective of adaptive dynamics. *Selection*, 2, 193–220.
- 698 Metcalf, C., Rose, K., Childs, D., Sheppard, A., Grubb, P. & Rees, M. (2008). Evolution of flowering decisions in a  
699 stochastic, density-dependent environment. *P. Natl. Acad. Sci. USA.*, 105, 10466–10470.
- 700 Murren, C.J., Maclean, H.J., Diamond, S.E., Steiner, U.K., Heskell, M.A., Handelsman, C.A., *et al.* (2014).  
701 Evolutionary change in continuous reaction norms. *Am. Nat.*, 183, 453–467.



- 702 Nielsen, J., Hedeholm, R.B., Heinemeier, J., Bushnell, P.G., Christiansen, J.S., Olsen, J., *et al.* (2016). Eye lens  
703 radiocarbon reveals centuries of longevity in the greenland shark (*somniosus microcephalus*). *Science*, 353,  
704 702–704.
- 705 Nussey, D.H., Froy, H., Lemaitre, J.-F., Gaillard, J.-M. & Austad, S.N. (2013). Senescence in natural populations of  
706 animals: Widespread evidence and its implications for bio-gerontology. *Ageing Res. Rev.*, 12, 214–225.
- 707 Owen-Smith, N. (2002). A metaphysiological modelling approach to stability in herbivore–vegetation systems. *Ecol.*  
708 *Model.*, 149, 153–178.
- 709 Raia, P. & Meiri, S. (2006). The island rule in large mammals: Paleontology meets ecology. *Evolution*, 60, 1731–1742.
- 710 Reznick, D.A., Bryga, H. & Endler, J.A. (1990). Experimentally induced life-history evolution in a natural population.  
711 *Nature*, 346, 357–359.
- 712 Reznick, D. & Endler, J.A. (1982). The impact of predation on life history evolution in Trinidadian guppies (*Poecilia*  
713 *reticulata*). *Evolution*, 160–177.
- 714 Roff, D. (1993). *Evolution of life histories: Theory and analysis*. Springer Science & Business Media.
- 715 Ronget, V., Gaillard, J.-M., Coulson, T., Garratt, M., Gueyffier, F., Lega, J.-C., *et al.* (2018). Causes and  
716 consequences of variation in offspring body mass: Meta-analyses in birds and mammals. *Biol. Rev.*, 93, 1–27.
- 717 Sæther, B.-E. & Engen, S. (2015). The concept of fitness in fluctuating environments. *Trends Ecol. Evol.*, 30,  
718 273–281.
- 719 Sander, P.M., Christian, A., Clauss, M., Fechner, R., Gee, C.T., Griebeler, E.-M., *et al.* (2011). Biology of the  
720 sauropod dinosaurs: The evolution of gigantism. *Biol. Rev.*, 86, 117–155.
- 721 Sandvig, E.M., Coulson, T. & Clegg, S.M. (2019). The effect of insularity on avian growth rates and implications for  
722 insular body size evolution. *Proceedings of the Royal Society B*, 286, 20181967.
- 723 Savage, V.M., Gillooly, J.F., Woodruff, W.H., West, G.B., Allen, A.P., Enquist, B.J., *et al.* (2004). The predominance  
724 of quarter-power scaling in biology. *Funct. Ecol.*, 18, 257–282.
- 725 Schreiber, S.J. (2021). Positively and negatively autocorrelated environmental fluctuations have opposing effects on  
726 species coexistence. *Am. Nat.*, 197, 405–414.
- 727 Smallegange, I.M., Caswell, H., Toorians, M.E. & Roos, A.M. de. (2017). Mechanistic description of population  
728 dynamics using dynamic energy budget theory incorporated into integral projection models. *Methods Ecol. Evol.*,  
729 8, 146–154.
- 730 Smith, C.C. & Fretwell, S.D. (1974). The optimal balance between size and number of offspring. *Am. Nat.*, 108,  
731 499–506.
- 732 Stearns, S.C. (1977). The evolution of life history traits: A critique of the theory and a review of the data. *Annu.*  
733 *Rev. Ecol. Syst.*, 8, 145–171.
- 734 Stearns, S.C. (1992). *The evolution of life histories*. Book. Oxford University Press Oxford ; New York.
- 735 Stearns, S.C. & Koella, J.C. (1986). The evolution of phenotypic plasticity in life-history traits: Predictions of

736 reaction norms for age and size at maturity. *Evolution*, 40, 893–913.

737 Steiner, U.K., Tuljapurkar, S., Coulson, T. & Horvitz, C. (2012). Trading stages: Life expectancies in structured  
738 populations. *Exp. Gerontol.*, 47, 773–781.

739 Tavecchia, G., Coulson, T., Morgan, B.J., Pemberton, J.M., Pilkington, J., Gulland, F., *et al.* (2005). Predictors of  
740 reproductive cost in female soay sheep. *J. Anim. Ecol.*, 74, 201–213.

741 Tilman, David. (1982). *Resource competition and community structure / david tilman*. Book. Princeton University  
742 Press Princeton, N.J.

743 Travis, J., Reznick, D., Bassar, R.D., López-Sepulcre, A., Ferriere, R. & Coulson, T. (2014). Do eco-evo feedbacks  
744 help us understand nature? Answers from studies of the trinidadian guppy. *Adv. Ecol. Res.*, 50, 1–40.

745 Tuljapurkar, S., Gaillard, J.-M. & Coulson, T. (2009). From stochastic environments to life histories and back.  
746 *Philos. T. Roy. Soc. B.*, 364, 1499–1509.

747 Tuljapurkar, Shripad. (1990). *Population dynamics in variable environments*. Book. Springer-Verlag New York.

748 Turchin, P. (1999). Population regulation: A synthetic view. *Oikos*, 153–159.

749 Watson, W. & Walker, H. (2004). The world’s smallest vertebrate, schindleria brevipinguis, a new paedomorphic  
750 species in the family schindleriidae (perciformes: gobioidi). *Records-Australian Museum*.

751 West, G.B., Brown, J.H. & Enquist, B.J. (1997). A general model for the origin of allometric scaling laws in biology.  
752 *Science*, 276, 122–126.

753 White, T. (2008). The role of food, weather and climate in limiting the abundance of animals. *Biol. Rev.*, 83,  
754 227–248.

755 Winkler, D.W. & Wallin, K. (1987). Offspring size and number: A life history model linking effort per offspring and  
756 total effort. *Am. Nat.*, 129, 708–720.

## 757 Appendix

### 758 0.1 Linearisation of model

759 We linearised the model to demonstrate that the results are not a function of the non-linear aspect of our model.  
760 They are not.

761 We start with the simplification provided by equation (6) which we simplify the notation of to write  $1 = RJE$  where  
762  $R$  is reproduction  $J$  juvenile survival and  $E$  is life expectancy.

763 We can write  $R_N = \frac{dR}{dN} = b_R R$  where  $b_R$  is the density coefficient on an exponential  $R$ . If  $P_a$  is survival at age  $a$   
764 and  $b_p$  the density coefficient on the logistic, then

$$P_{a,N} = \frac{dP_a}{dN} = b_p P_K (1 - P_K) \approx b_p P_K. \quad (9)$$

765 It follows that, approximately,

$$J_N = \frac{dJ}{dN} = b_p a \bar{P} J_0 \quad (10)$$

766 where  $\bar{P}$  is average adult survival across the stable distribution of adult ages at  $N$ , and  $J_0$  is juvenile survival at  
767  $N = 0$ .

768 Next, we make the density effect linear,

$$RJE = R_0 J_0 (1 - bK) E = 1 \quad (11)$$

769 and

$$bK = 1 - \frac{1}{R_0 J_0 E} \quad (12)$$

770 where  $R_0$  is reproduction evaluated at  $N = 0$ . Depending on the scenario,  $b = b_R$  or  $b = b_P$ .

771 For a range of  $a$  from  $a_{min}$  to  $a_{max}$  and a linear increase in survival rate with  $P_a = P(z_a)$  with a slope of  $q$ , then,

$$P_a = P_a(a_{min}) + q(a - a_{min}). \quad (13)$$

772 If we assume survival is constant post sexual maturity at  $P_a$  then

$$E = \frac{1 - [P_a]^a}{1 - P_a} \quad (14)$$

773 The slope of  $E$  now depends upon  $q$  as well as  $a$ , and, as in our simulations, life expectancy will only increase when  
774  $q$  is large enough. We can now use values of  $E$ ,  $R_0$  and  $J_0$  to explore how linearised  $K$  varies as we change  $E$ ,  $b_P$   
775 and  $b_J$ . This is most easily done graphically. Mirroring our simulation results, divergent selection for  $K$  depends on  
776 a strong enough survival advantage of the delay in maturity. If not,  $K$  will just fall as  $a$  increases. Our results are  
777 consequently not due to the non-linearities in our functions.

Table 1: Parameters and variables used in models.

| Term                                  | Definition                                                                            |
|---------------------------------------|---------------------------------------------------------------------------------------|
| $a$                                   | Age                                                                                   |
| $a_m$                                 | Age at sexual maturity                                                                |
| $\beta_0, \alpha_0, \rho_0, \gamma_0$ | Intercepts of survival, development, recruitment, inheritance functions               |
| $\beta_z, \alpha_z, \rho_z$           | Body size slopes of survival, development, recruitment functions                      |
| $\beta_N, \alpha_N, \rho_N$           | Density slopes of survival, development, recruitment function s                       |
| $\alpha_v, \gamma_v$                  | Variance terms for development, inheritance functions                                 |
| $D(z' z, N, t)$                       | Inheritance function                                                                  |
| $E(a_m, K)$                           | Life expectancy at sexual maturity                                                    |
| $G(z' z, N, t)$                       | Development function                                                                  |
| $K$                                   | Carrying capacity                                                                     |
| $\mathbf{K}$                          | Population structure at carrying capacity                                             |
| $K_j, K_a$                            | Numbers of juveniles, adults at carrying capacity                                     |
| $L(a, K)$                             | Survivorship to age $a$ , evaluated at carrying capacity                              |
| $L(a_m, K)$                           | Proportion of each cohort surviving to sexual maturity evaluated at carrying capacity |
| $\lambda$                             | Population growth rate                                                                |
| $N$                                   | Population size                                                                       |
| $N(z, t)$                             | Distribution of body size $z$ at time $t$                                             |
| $R_0$                                 | Mean lifetime reproductive success                                                    |
| $R(z, N, t)$                          | Recruitment function                                                                  |
| $R(a, K)$                             | Per-capita reproductive success at age $a$ , evaluated at carrying capacity           |
| $\theta(\mu=..., \sigma^2=...)$       | Normal distribution with mean $\mu$ and variance $\sigma^2$                           |
| $S(z, N, t)$                          | Survival function                                                                     |
| $t$                                   | Time                                                                                  |
| $z, z'$                               | Body size at time $t, t+1$                                                            |
| $z_a$                                 | Size at sexual maturity, 80% of asymptotic size                                       |

Table 2. Model parameters

| Function                           | Intercept | Body size slope | Density slope | Variance intercept |
|------------------------------------|-----------|-----------------|---------------|--------------------|
| Survival parameters scenario 1     | -0.875    | 0.15            | 0             |                    |
| Survival parameters scenario 2     | 0.25      | 0.125           | -0.001        |                    |
| Reproduction parameters scenario 1 | 1         | 0               | -0.001        |                    |
| Reproduction parameters scenario 2 | -1        | 0               | 0             |                    |
| Growth parameters                  | 6.8       | 0.3             | 0             | 1                  |
|                                    | 6.69      | 0.33            | 0             | 1                  |
|                                    | 6.59      | 0.35            | 0             | 1                  |
| ...                                |           |                 |               |                    |
|                                    | 4.8       | 0.8             | 0             | 1                  |
| Offspring parameters               | 4         | 0               | 0             | 1                  |

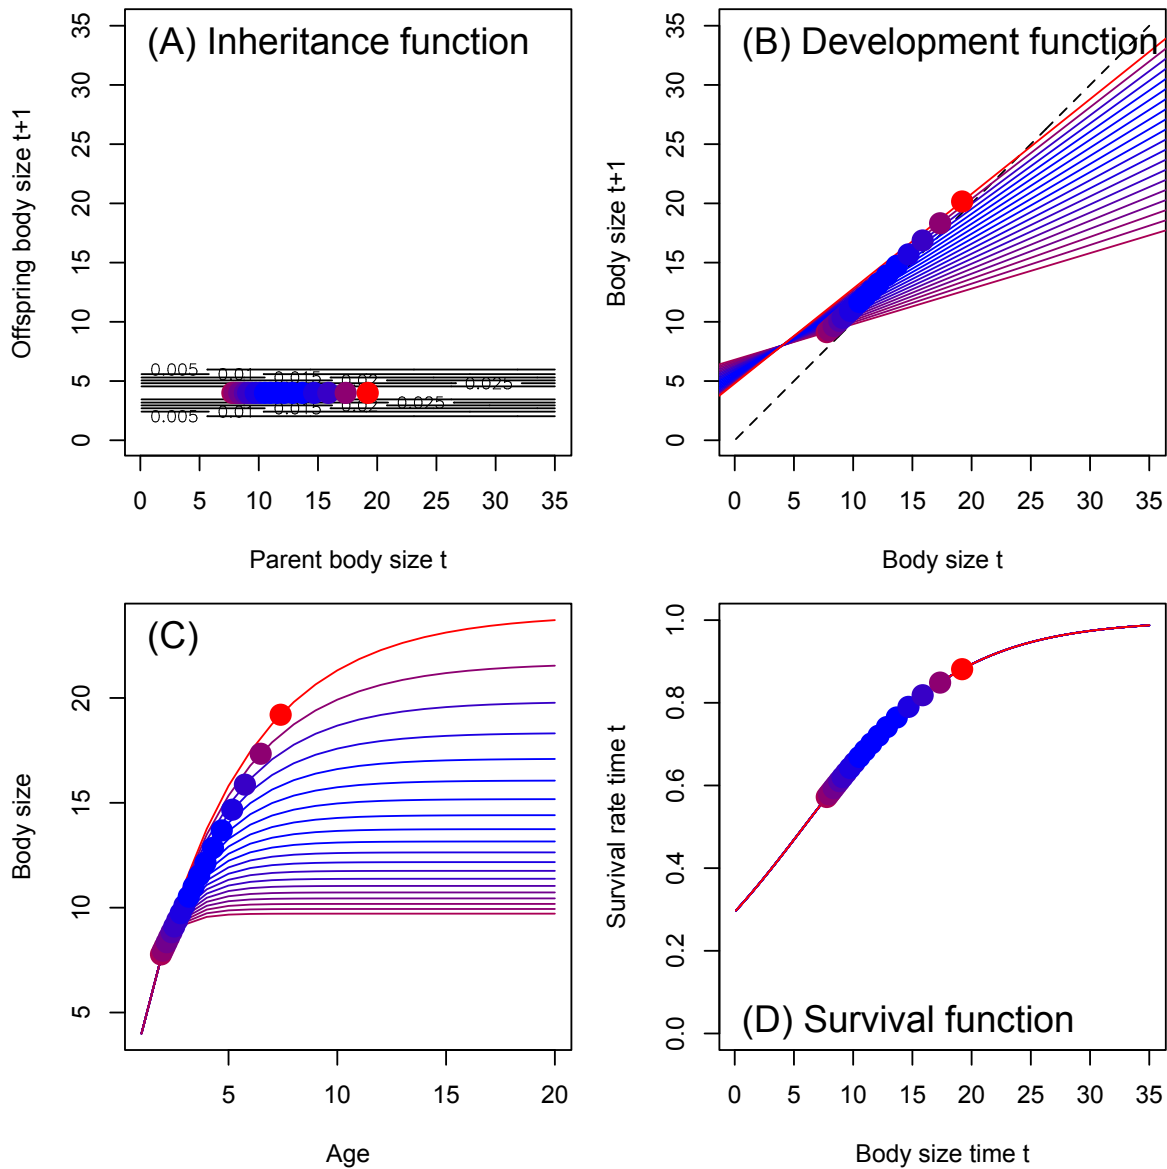

Figure 1. Density-independent functions in scenario 1. (A) association between parental size at time  $t$  and offspring size at time  $t+1$ , (B) development functions, (C) monomolecular growth functions, (D) body size-survival function. Each point represents one of our 20 life histories. The redder the colour of a point, the fitter the life history strategy.

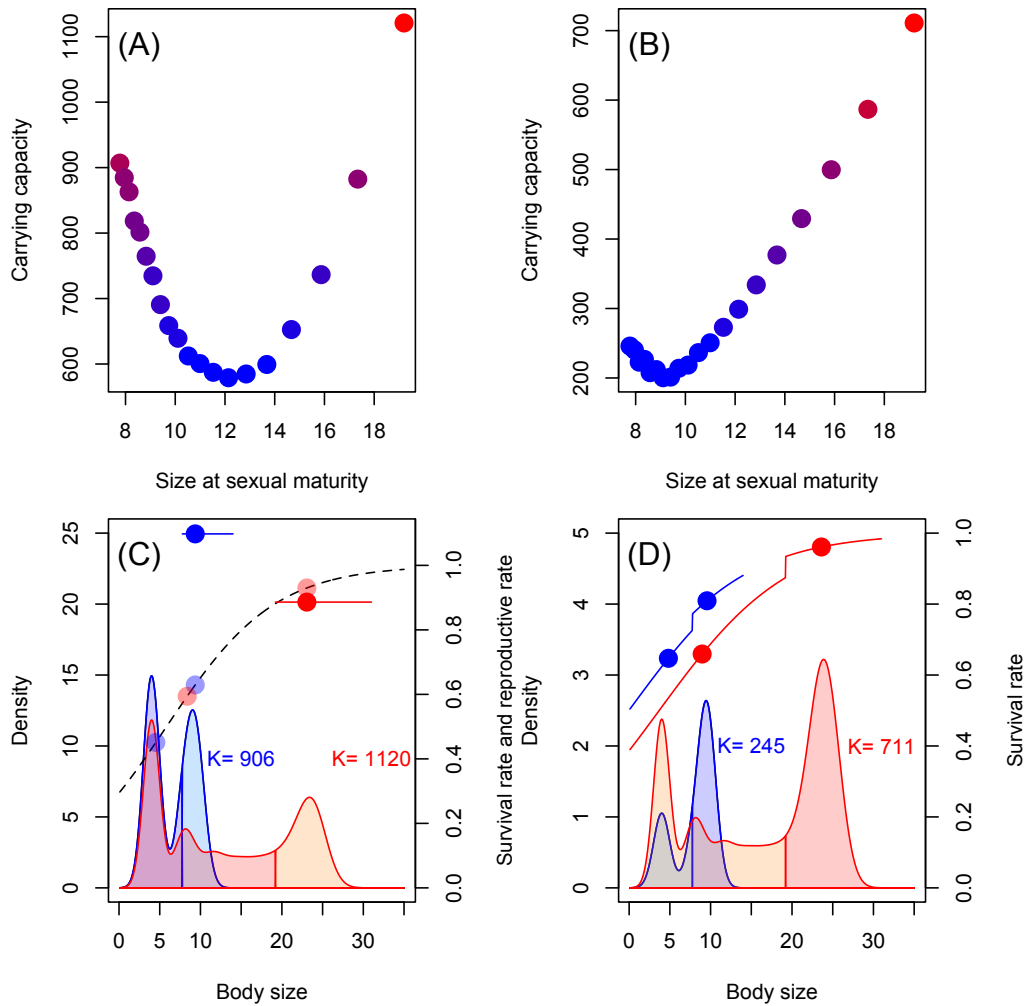

*Figure 2. Scenario outcomes and why different life histories have different carrying capacities at equilibrium. Disruptive selection on size at sexual maturity for (A) scenario 1 and (B) scenario 2. Each point represents one of our 20 life histories. The redder the colour of a point, the fitter the life history strategy. (C) In scenario 1, the stable size distribution differs between life histories (polygons). Two life histories are shown - one shaded blue (small size, fast life history, lower fitness) and the other in red (large size, slow life history, higher fitness). Vertical lines separate juveniles from adults. The different development rates across life histories result in different juvenile and adult survival rates (pastel dots on dashed black line) despite both strategies being defined with identical body size-survival functions. The higher survival rates in the slower life history allow a lower rate of per-capita reproduction (horizontal lines and brightly coloured dots) and this is achieved via a higher carrying capacity (red and blue numbers). The models produce the observed stable size-structures. (D) a version of (C) for scenario 2. Juvenile survival is density-dependent while the reproductive rate is constant across life histories (not shown). The slower life history has a higher carrying capacity ( $K=711$ ) than the faster one ( $K=245$ ) and consequently has a lower elevation of the survival function (compare the heights of the blue and red curves at low values of body size). However, because juvenile and adult size is larger in the slower life history, juvenile and adult survival rates are also higher than for the slower life history (compare red and blue dots which show survival rates for mean juvenile and mean adult body size). In (C) and (D) the solid points represent density-dependent rates.*

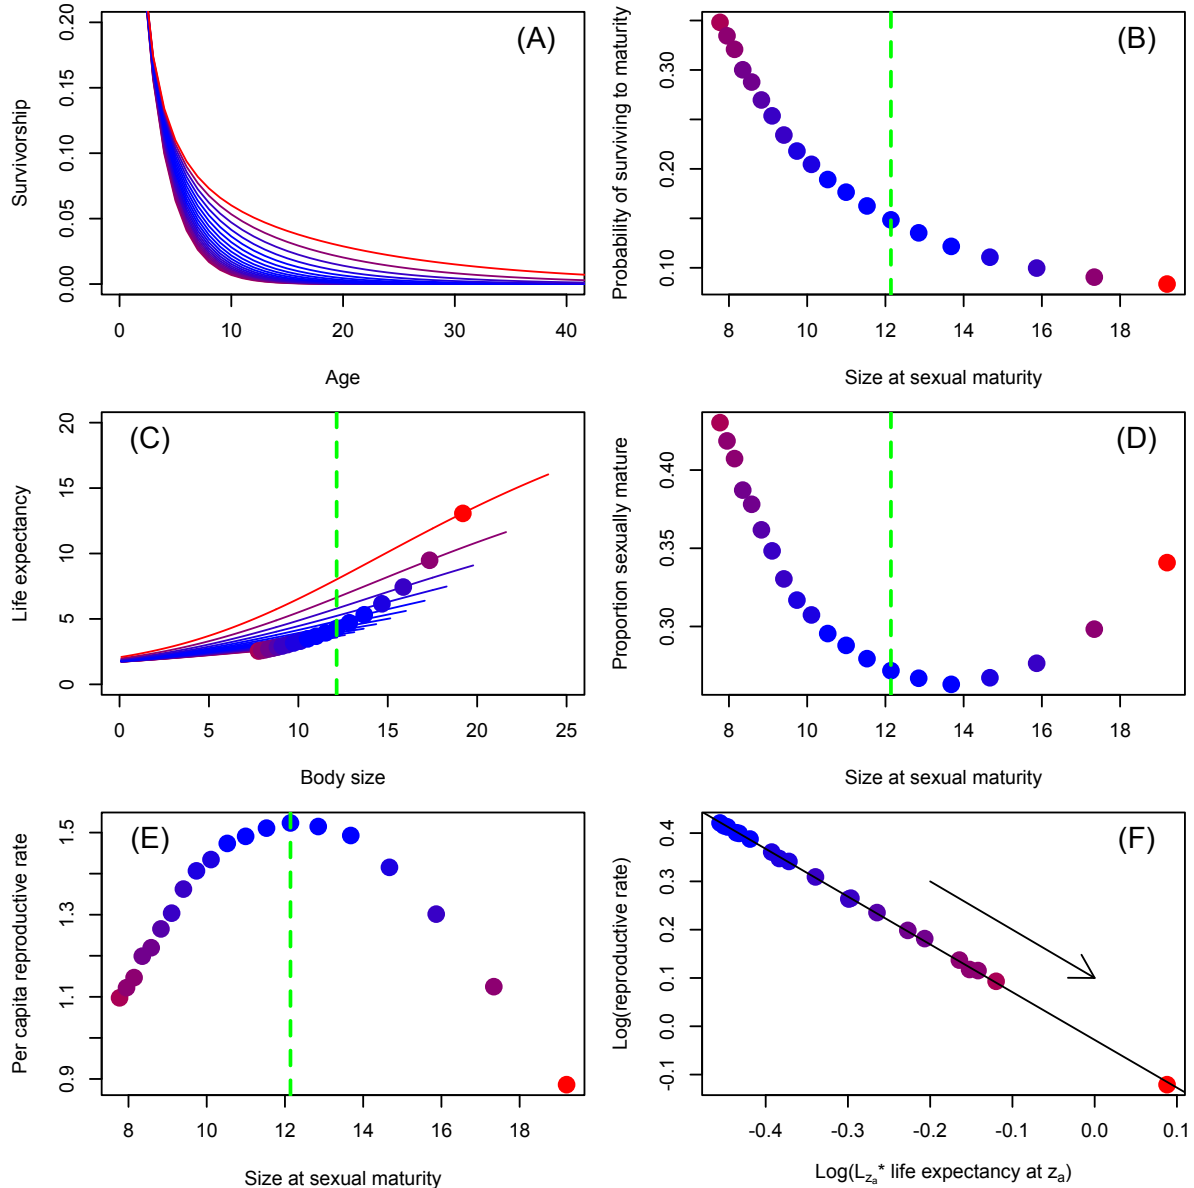

**Figure 3.** (A) survivorship functions for each life history, (B) survivorship to sexual maturity as a function of size at sexual maturity, (C) life expectancy as a function of body size, (D) proportion of population that is sexually mature as a function of size at sexual maturity, and (E) per-time step per-capita reproductive rate as a function of size at sexual maturity, and (F) trade-off between the log of the density-independent rates with the log of the per-capita per-time step reproductive rate (the arrow represents the direction of evolution). The dotted green vertical lines in (B-E) represent the life history of minimum fitness. Each point represents one of our 20 life histories. The redder the colour of a point, the fitter the life history strategy.



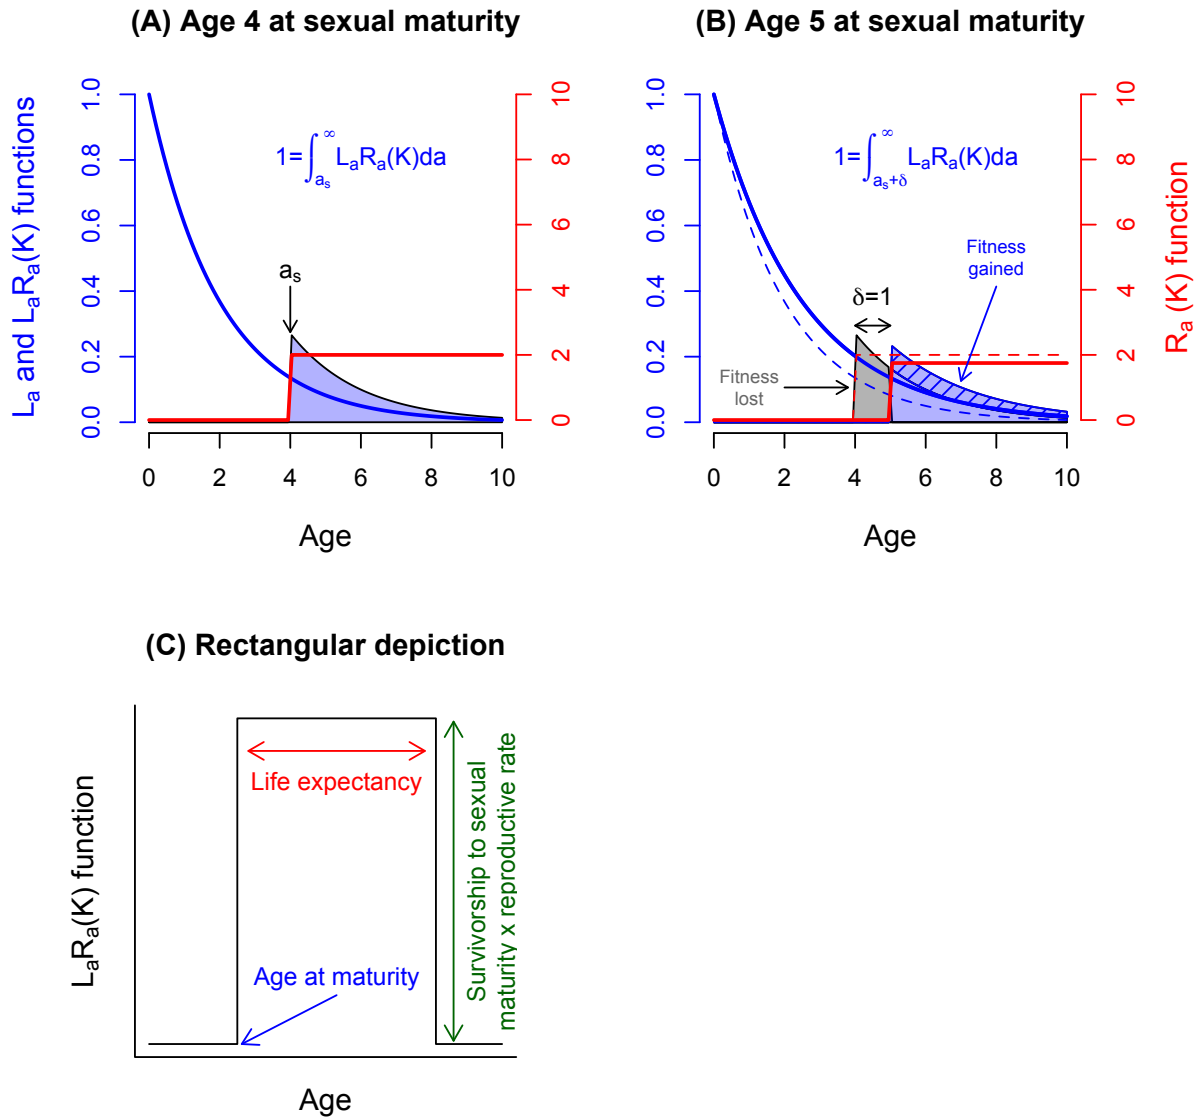

Figure 4. Summary of the age-structured life history dynamics of the model where the reproduction function is density-dependent as in Scenario 1. The initial life history strategy is depicted in (A), the mutant strategy, with a delayed age at sexual maturity, in (B). The delay in age at sexual maturity results in a change in the development function (see Figure 1(B,C)) that results in an elevation of the survivorship function (compare the solid blue line in (B) to the solid blue line in (A) which is also represented by the dotted blue line in (B)). Because the volume of the blue polygon in (A) and (B) must equal unity (equations on plot), the reproduction function is depressed in (B) compared to (A) (compare the solid red lines in (A) and (B)). The grey and hashed blue polygons in (B) show how the polygon has changed shape between the two life histories. (C) Rectangular approximation of the life history function used to identify trade-offs.

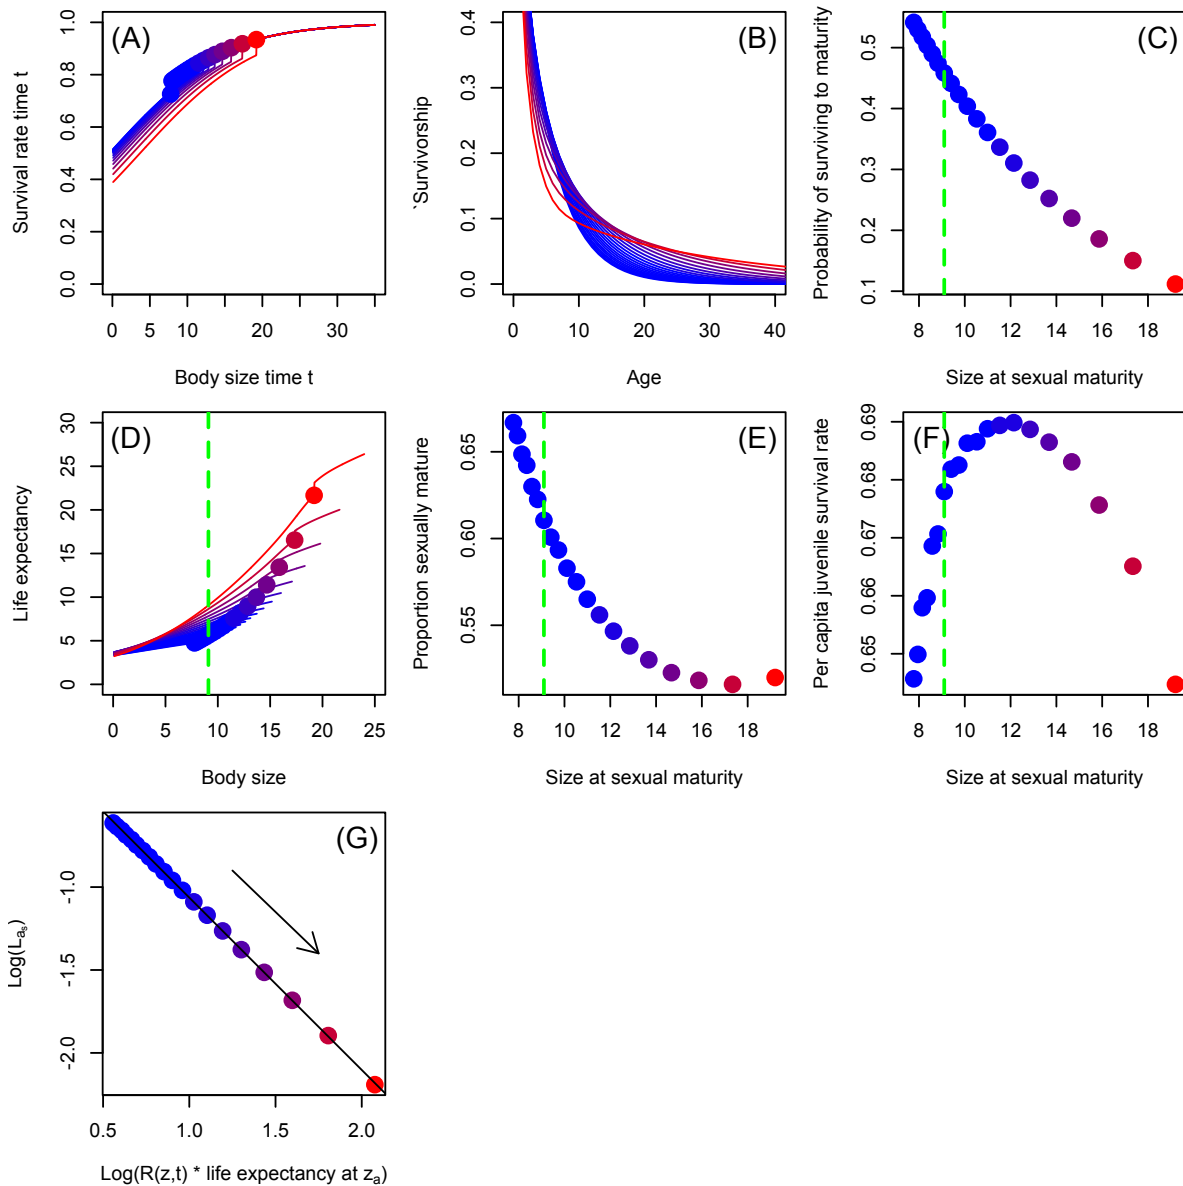

**Figure 5. Model structure and outputs when the juvenile survival function is density-dependent (scenario 2).** (A) body size-survival function, (B) survivorship functions for each life history, (C) survivorship to sexual maturity as a function of size at sexual maturity, (D) life expectancy as a function of body size, (E) proportion of population that is sexually mature as a function of size at sexual maturity, and (F) per-time step per-capita juvenile survival rate as a function of size at sexual maturity for each life history. (G) linear associations between the log of the density-independent rates against the log of the density-dependent rate. Each point represents one of our 20 life histories. The redder the colour of a point, the fitter the life history strategy.

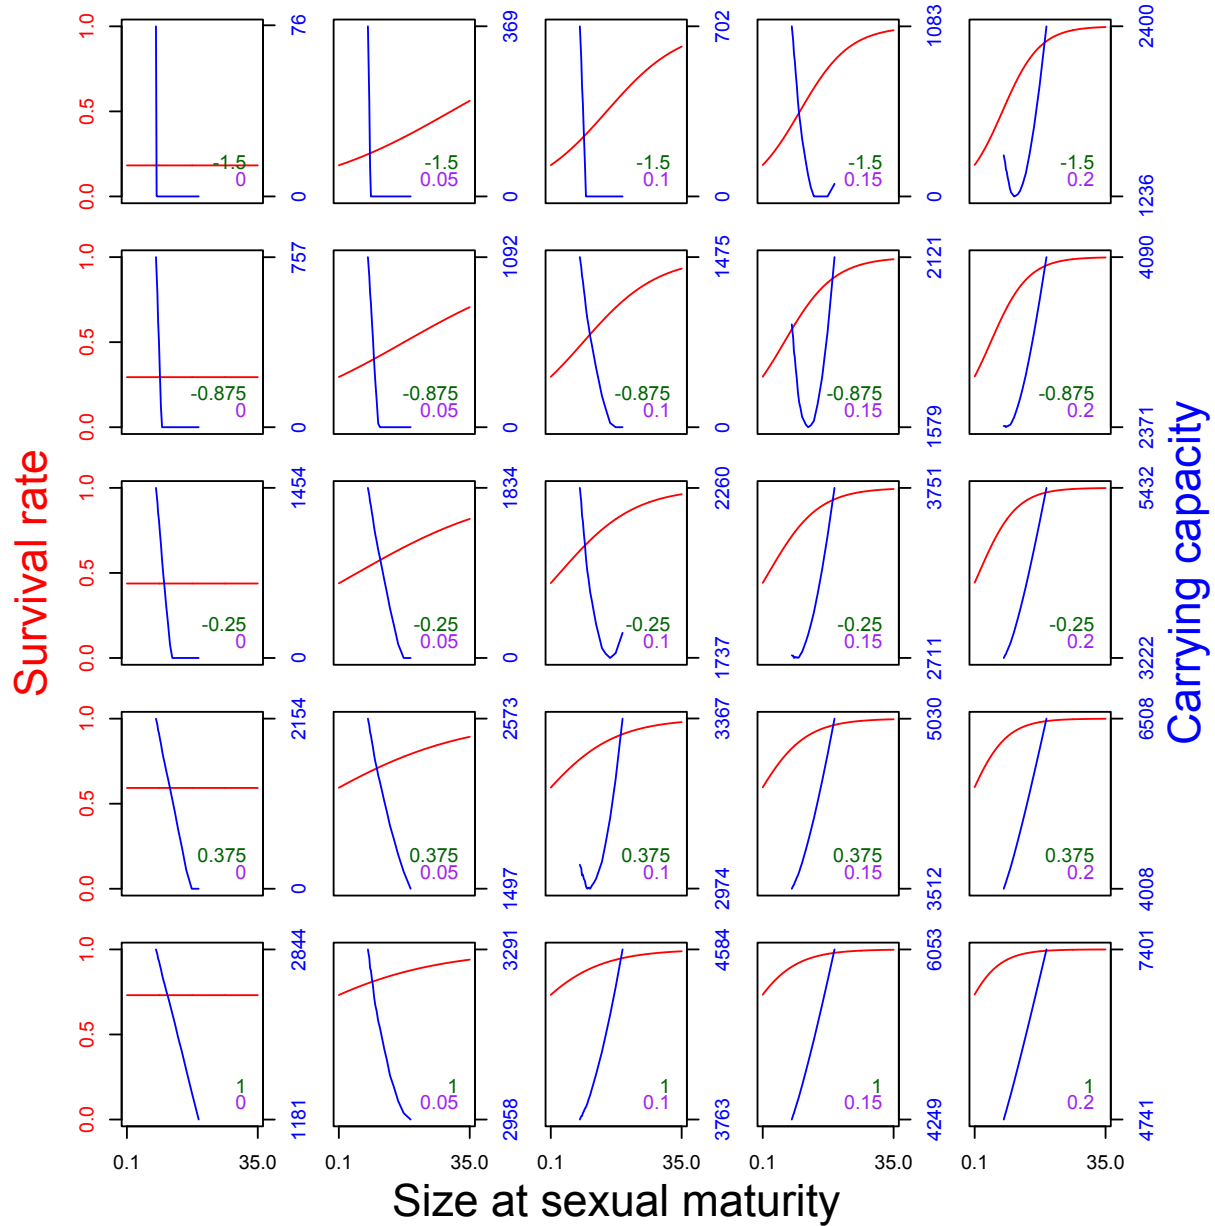

Figure 6. Dynamical consequences of altering the intercept and slope of the body size-survival function. As the elevation of the intercept (rows, and green numbers) and steepness of slope (columns and purple numbers) are altered, the change in the size-survival function (red lines) alters selection on size at sexual maturity (blue lines).

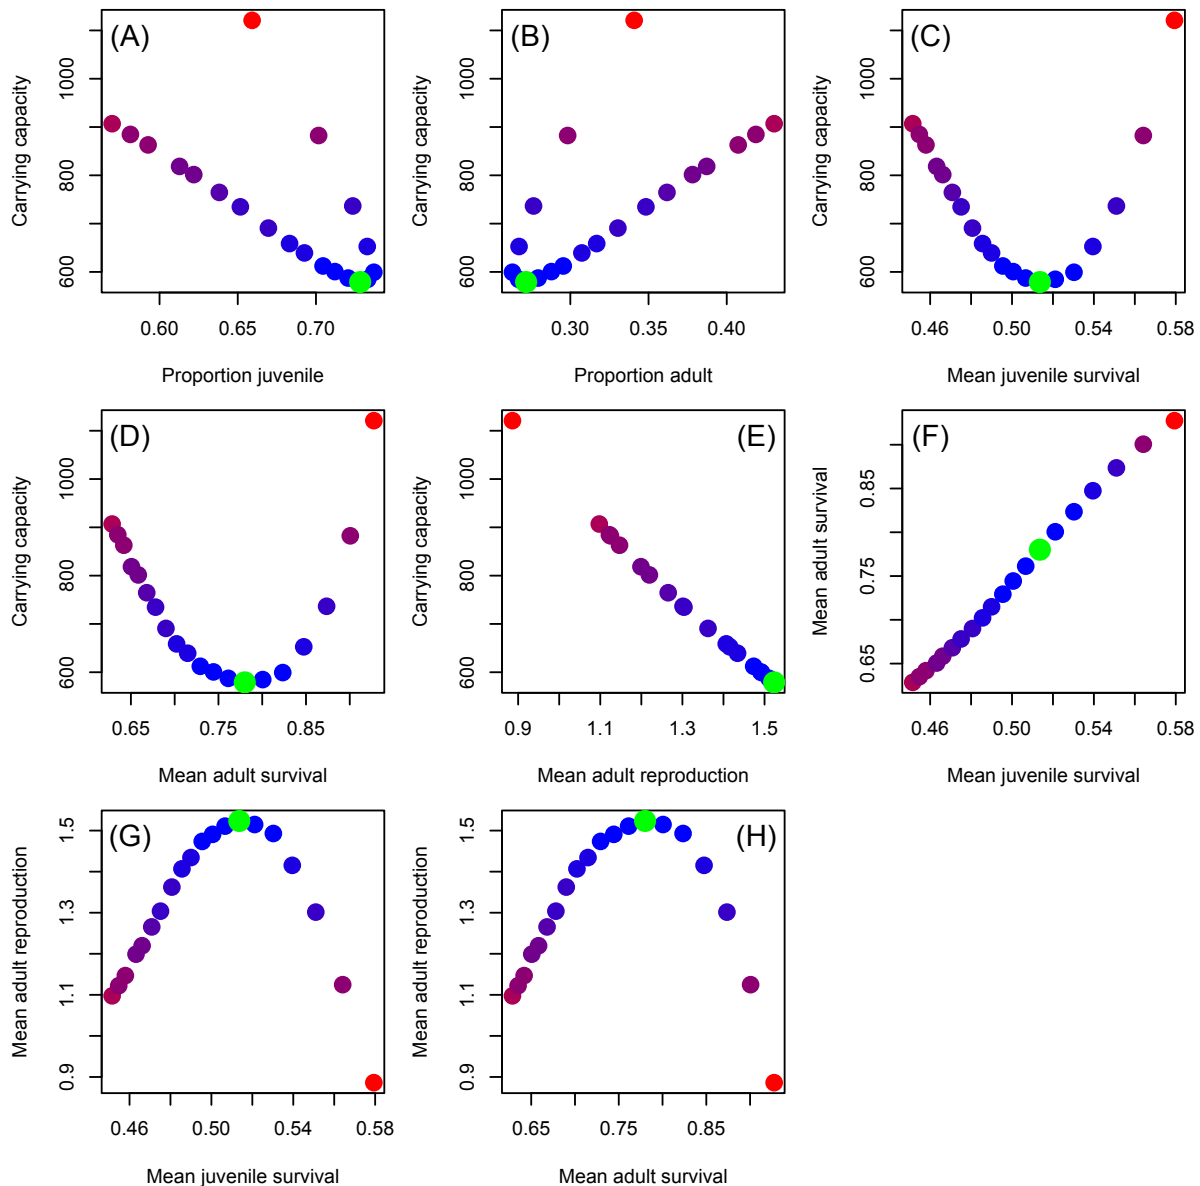

*Figure S1. Associations across life histories and between the terms that determine carrying capacity and carrying capacity for the model with density dependence in reproduction. (A) population size of juveniles, (B) population size of adults, (C) mean juvenile survival rate, (D) mean adult survival rate, (E) mean reproductive rate, (F) population size of juveniles x mean juvenile survival rate, (G) population size of adults x mean adult survival rate, (H) population size of adults x recruitment rate, (H) population size of adults x (mean adult survival + mean reproductive rate). Blue dots represent fast life histories, red dots slower ones. Each point represents one of our 20 life histories. The redder the colour of a point, the fitter the life history strategy.*

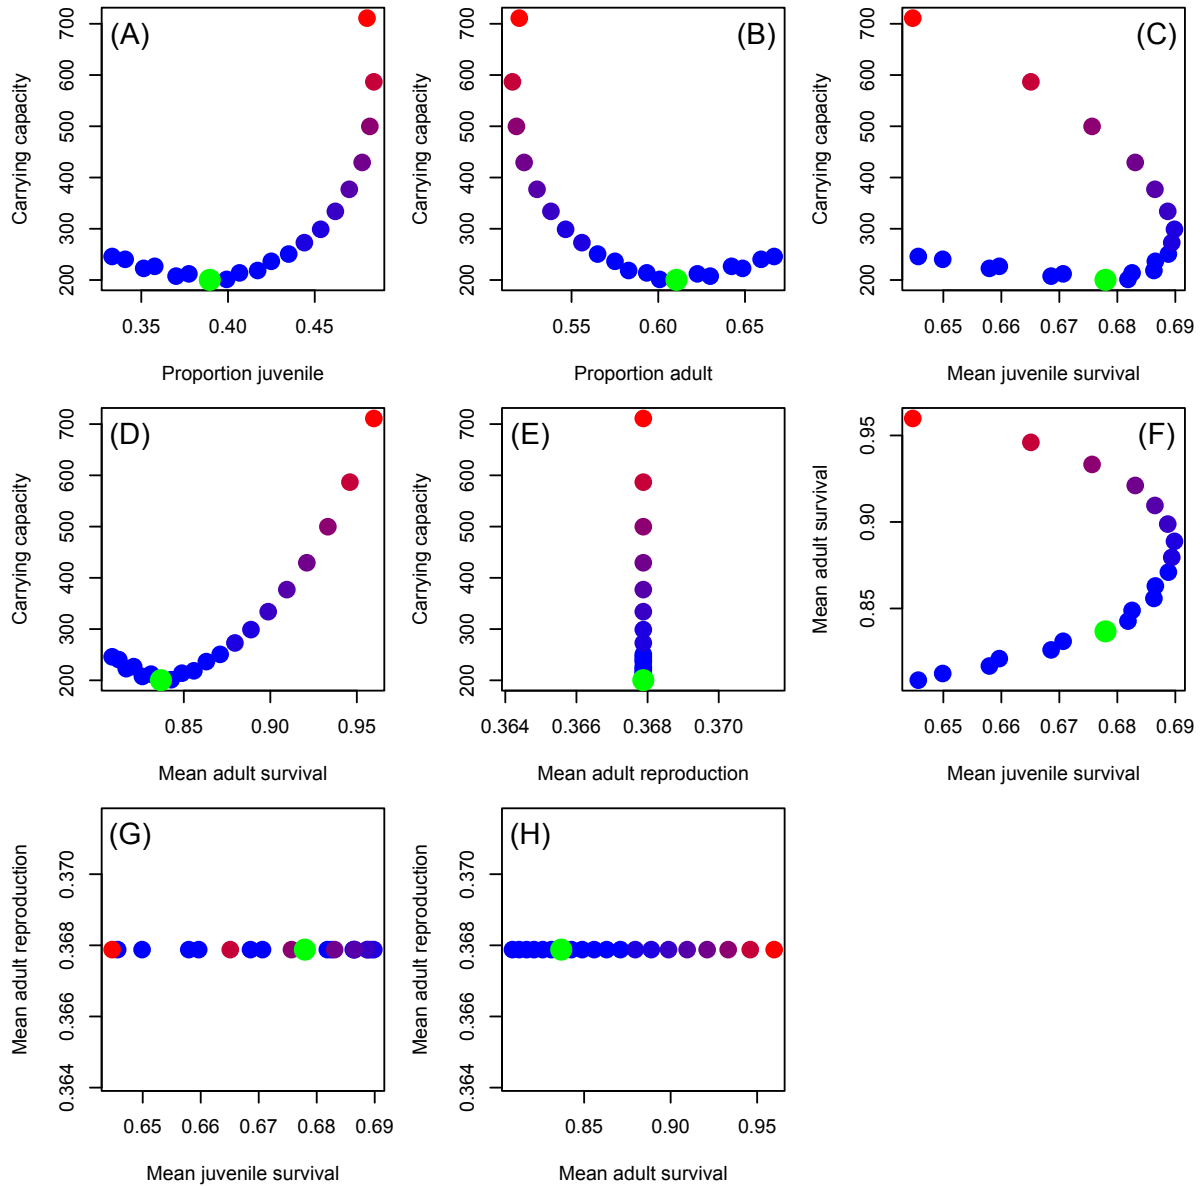

*Figure S2. Association across life history between the terms that determine carrying capacity and carrying capacity for the model with density dependence in juvenile survival. (A) population size of juveniles, (B) population size of adults, (C) mean juveniles survival rate, (D) mean adult survival rate, (E) mean reproductive rate, (F) population size of juveniles x mean juvenile survival rate, (G) population size of adults x mean adult survival rate, (H) population size of adults x recruitment rate, (H) population size of adults x (mean adult survival + mean reproductive rate). Blue dots represent fast life histories, red dots slower ones. Each point represents one of our 20 life histories. The redder the colour of a point, the fitter the life history strategy.*

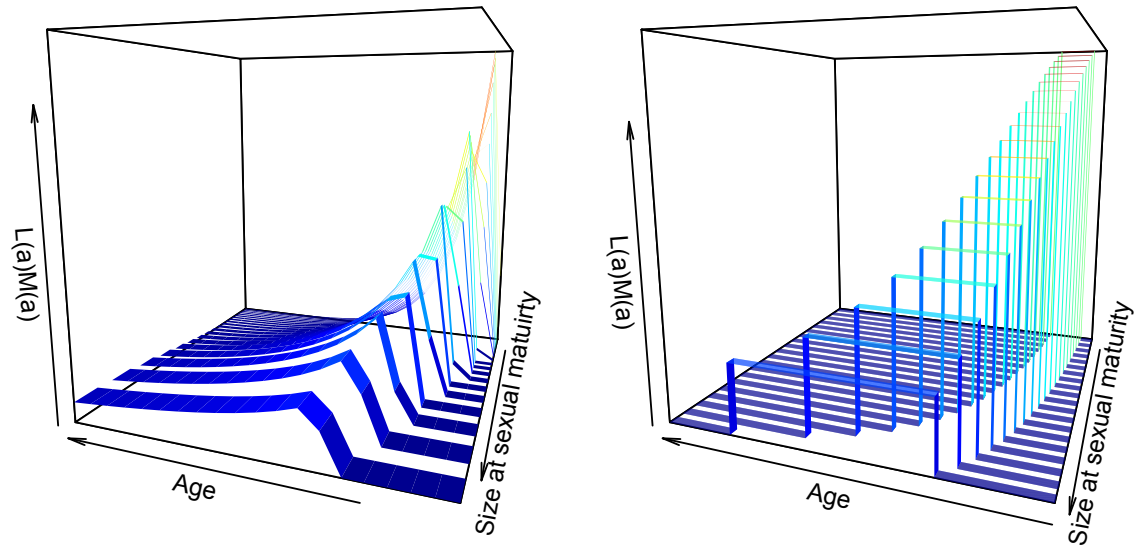

Figure S3. The life history functions for each of the 20 life histories for scenario 1 (left), along with the rectangular approximation we use (right). See figure 4(C) for an additional description of this approximation.
